# Supplementary material for: Comparative Transcriptome and DNA Methylation Analysis in Temperature-Sensitive Genic Male Sterile Wheat BS366
Source: Research Square preprint supplement (doi:10.21203/rs.3.rs-582568/v1), 2021-07-07
Supplement: Supplementary file 1 [file 0d7463be1d4ad1bf28470fa5.xlsx]

## Sheet: bp
Supplementary Table S3 Gene Ontology (GO) analysis of the differentially expressed genes assigned to the turquoise module. Go terms in bp, cc, and mf were shown in separate sheets. bp, biological process; mf, molecular function; cc, cellular component.
GO.ID	Term	Annotated	Significant	Expected	Fisher	gene
GO:0006412	translation	2024	128	26.11	< 1e-30	TraesCS5A02G415600, TraesCS5A02G227800, TraesCS5B02G159400, TraesCS7A02G362900, TraesCS2D02G064500, TraesCS3A02G107800, TraesCS4A02G262300, TraesCS2D02G264000, TraesCS7D02G016500, TraesCS1B02G146100, TraesCS2A02G066100, TraesCS2B02G293800, TraesCS5B02G446300, TraesCS4A02G107600, TraesCS2A02G362000, TraesCS7B02G198400, TraesCS2B02G194400, TraesCS1D02G101600, TraesCS2B02G097100, TraesCS4B02G260600,…
GO:0006268	DNA unwinding involved in DNA replication	18	14	0.23	9e-24	TraesCS5A02G088400, TraesCS3A02G200400, TraesCS5B02G094600, TraesCS1D02G298400, TraesCS6B02G393500, TraesCS1B02G274600, TraesCS1D02G264100, TraesCS1B02G309300, TraesCS1A02G299500, TraesCS1B02G146200, TraesCS1A02G264000, TraesCS3D02G203400, TraesCS6D02G344100, TraesCS5D02G100800
GO:0006334	nucleosome assembly	94	21	1.21	3.1e-20	TraesCS6D02G185800, TraesCS5D02G452000, TraesCS5D02G451200, TraesCS2B02G415900, TraesCS5B02G449000, TraesCS5A02G443900, TraesCS6A02G202200, TraesCS5D02G341200, TraesCS2A02G397600, TraesCS5A02G443800, TraesCS1A02G445900, TraesCS2D02G395200, TraesCS5D02G451300, TraesCS1B02G480600, TraesCS2B02G415700, TraesCS5A02G336500, TraesCS5B02G335500, TraesCS5B02G448200, TraesCS5B02G448500, TraesCS2D02G395400,…
GO:0046686	response to cadmium ion	1465	63	18.9	1.3e-16	TraesCS2A02G169800, TraesCS1B02G165900, TraesCS7B02G031500, TraesCS5D02G423300, TraesCS1D02G121200, TraesCS6D02G384200, TraesCS7D02G257300, TraesCS5A02G479300, TraesCS7D02G306600, TraesCS1A02G282300, TraesCS5A02G168500, TraesCS1B02G172400, TraesCS7D02G454200, TraesCS1B02G139600, TraesCS7B02G162300, TraesCS5B02G022800, TraesCS5B02G492500, TraesCS3A02G130000, TraesCS6D02G049100, TraesCS3A02G341000,…
GO:0006270	DNA replication initiation	43	14	0.55	1.7e-16	TraesCS6B02G393500, TraesCS1A02G299500, TraesCS1B02G274600, TraesCS3D02G203400, TraesCS6D02G344100, TraesCS1D02G264100, TraesCS1B02G146200, TraesCS5A02G088400, TraesCS1A02G264000, TraesCS5B02G094600, TraesCS1B02G309300, TraesCS5D02G100800, TraesCS1D02G298400, TraesCS3A02G200400
GO:0009735	response to cytokinin	1310	59	16.9	4.3e-15	TraesCS2D02G064500, TraesCS5D02G509700, TraesCS7D02G257300, TraesCS2A02G296000, TraesCS7D02G306600, TraesCS1D02G264200, TraesCS1B02G172400, TraesCS2B02G189500, TraesCS1D02G282900, TraesCS7B02G362600, TraesCS6D02G049100, TraesCS7B02G184100, TraesCS6A02G107700, TraesCS1D02G442400, TraesCS4D02G050800, TraesCS1A02G433000, TraesCS1B02G434000, TraesCS5D02G509600, TraesCS1B02G367100, TraesCS2A02G547200,…
GO:0006457	protein folding	453	35	5.84	6.2e-13	TraesCS6A02G042600, TraesCS7A02G529900, TraesCS7D02G403300, TraesCS6B02G208900, TraesCS7B02G269300, TraesCS5B02G258900, TraesCS7A02G291600, TraesCS6A02G101900, TraesCS7A02G358400, TraesCS5D02G268000, TraesCS7A02G346200, TraesCS7D02G284400, TraesCS2A02G545600, TraesCS2B02G260600, TraesCS6D02G232600, TraesCS5D02G276100, TraesCS7B02G237000, TraesCS6A02G176900, TraesCS5B02G374900, TraesCS5A02G268100,…
GO:0010501	RNA secondary structure unwinding	12	7	0.15	4.3e-11	TraesCS4B02G020300, TraesCS1B02G273000, TraesCS1B02G273100, TraesCS1D02G262400, TraesCS4A02G293000, TraesCS1A02G262400, TraesCS4D02G018500
GO:0006414	translational elongation	108	14	1.39	1.4e-10	TraesCS4A02G107600, TraesCS5B02G418100, TraesCS4D02G197100, TraesCS2B02G097100, TraesCS2A02G169800, TraesCS7D02G360200, TraesCS5A02G415400, TraesCS5A02G415600, TraesCS2A02G083000, TraesCS7A02G362900, TraesCS7B02G266300, TraesCS5B02G418200, TraesCS2D02G080800, TraesCS5D02G423300
GO:0071258	cellular response to gravity	14	7	0.18	1.8e-10	TraesCS5A02G407800, TraesCS1B02G364500, TraesCS1A02G350200, TraesCS4D02G057000, TraesCS1D02G353100, TraesCS4A02G257800, TraesCS5D02G417700
GO:0097549	chromatin organization involved in negative regulation of transcription	196	17	2.53	9.4e-10	TraesCS2B02G260300, TraesCS2D02G489900, TraesCS6A02G380200, TraesCS2D02G493500, TraesCS4A02G261000, TraesCS2B02G521600, TraesCS1D02G002400, TraesCS3A02G188400, TraesCS7D02G289200, TraesCS7B02G289500, TraesCS6B02G419000, TraesCS4D02G053600, TraesCS5A02G302000, TraesCS7B02G183600, TraesCS1A02G005700, TraesCS6D02G364900, TraesCS7A02G286200
GO:0009651	response to salt stress	2454	73	31.66	1.3e-09	TraesCS2B02G194400, TraesCS4B02G101800, TraesCS1B02G273100, TraesCS7D02G009400, TraesCS1B02G172400, TraesCS3B02G321000, TraesCS5B02G258900, TraesCS5B02G013200, TraesCS1D02G262400, TraesCS2A02G293700, TraesCS3A02G183700, TraesCS1A02G282300, TraesCS2B02G576100, TraesCS1D02G355800, TraesCS1D02G420600, TraesCS1B02G273000, TraesCS5A02G407800, TraesCS4D02G057000, TraesCS5B02G249000, TraesCS6A02G213700,…
GO:0010043	response to zinc ion	292	20	3.77	2e-09	TraesCS7B02G209900, TraesCS5D02G020900, TraesCS5A02G015000, TraesCS7B02G266300, TraesCS5A02G152400, TraesCS4B02G101800, TraesCS1B02G172400, TraesCS1D02G153900, TraesCS5B02G022800, TraesCS4A02G293000, TraesCS5B02G013200, TraesCS5D02G031300, TraesCS7D02G306600, TraesCS7D02G360200, TraesCS1B02G059100, TraesCS4D02G018500, TraesCS4D02G295500, TraesCS7A02G362900, TraesCS4B02G020300, TraesCS5A02G140200
GO:0032508	DNA duplex unwinding	44	21	0.57	2.7e-08	TraesCS6B02G393500, TraesCS1A02G299500, TraesCS1B02G274600, TraesCS1A02G262400, TraesCS1B02G273000, TraesCS4D02G018500, TraesCS6D02G344100, TraesCS3D02G203400, TraesCS4B02G020300, TraesCS4A02G293000, TraesCS1B02G273100, TraesCS1D02G264100, TraesCS1B02G146200, TraesCS5A02G088400, TraesCS1D02G262400, TraesCS1A02G264000, TraesCS5B02G094600, TraesCS1B02G309300, TraesCS5D02G100800, TraesCS1D02G298400,…
GO:0009631	cold acclimation	162	13	2.09	2.2e-07	TraesCS5B02G509700, TraesCS7A02G461100, TraesCS1D02G262400, TraesCS5D02G509800, TraesCS5B02G509600, TraesCS1B02G273100, TraesCS7D02G449300, TraesCS5D02G509700, TraesCS1A02G262400, TraesCS7B02G362600, TraesCS1B02G273000, TraesCS5D02G509600, TraesCS7A02G307400
GO:0031507	heterochromatin assembly	13	5	0.17	4.2e-07	TraesCS5D02G341200, TraesCS5B02G335500, TraesCS5A02G336500, TraesCS1A02G005700, TraesCS1D02G002400
GO:0006413	translational initiation	174	13	2.25	5e-07	TraesCS5D02G416000, TraesCS5A02G442500, TraesCS5D02G449900, TraesCS4B02G170900, TraesCS5B02G159400, TraesCS5B02G437200, TraesCS4D02G172900, TraesCS5B02G446600, TraesCS5A02G220000, TraesCS6B02G307400, TraesCS5D02G442100, TraesCS5D02G228100, TraesCS5D02G167000
GO:0000380	alternative mRNA splicing, via spliceosome	55	8	0.71	5.3e-07	TraesCS4D02G018500, TraesCS7B02G029700, TraesCS5D02G020900, TraesCS4B02G020300, TraesCS4A02G293000, TraesCS5A02G015000, TraesCS7D02G128800, TraesCS5B02G013200
GO:0006265	DNA topological change	45	7	0.58	1.7e-06	TraesCS6D02G246300, TraesCS1A02G260500, TraesCS7A02G302200, TraesCS1B02G271100, TraesCS1D02G260500, TraesCS6B02G295700, TraesCS6A02G268600
GO:0010069	zygote asymmetric cytokinesis in embryo sac	31	6	0.4	2.5e-06	TraesCS2D02G241800, TraesCS2A02G235900, TraesCS6B02G419000, TraesCS6D02G364900, TraesCS2B02G260800, TraesCS6A02G380200
GO:0010228	vegetative to reproductive phase transition of meristem	754	27	9.73	2.6e-06	TraesCS6D02G028200, TraesCS1D02G099600, TraesCS1D02G121900, TraesCS1B02G140400, TraesCS7B02G094700, TraesCS5D02G172300, TraesCS6A02G024900, TraesCS1A02G262400, TraesCS1B02G273000, TraesCS7D02G287600, TraesCS1D02G002400, TraesCS7A02G287700, TraesCS2D02G068300, TraesCS5A02G168100, TraesCS3D02G211100, TraesCS4A02G293000, TraesCS6B02G151600, TraesCS1B02G273100, TraesCS2A02G069500, TraesCS6A02G123400,…
GO:0043457	regulation of cellular respiration	9	4	0.12	3.3e-06	TraesCS1B02G273000, TraesCS1B02G273100, TraesCS1D02G262400, TraesCS1A02G262400
GO:0006333	chromatin assembly or disassembly	121	28	1.56	4e-06	TraesCS5A02G443800, TraesCS2B02G415700, TraesCS5A02G352100, TraesCS1D02G002400, TraesCS1A02G005700, TraesCS5B02G448500, TraesCS5B02G449000, TraesCS5A02G443900, TraesCS1D02G099600, TraesCSU02G099700, TraesCS5D02G452000, TraesCS2B02G415900, TraesCS5B02G335500, TraesCS5A02G336500, TraesCS2D02G395200, TraesCS7D02G538400, TraesCS6A02G202200, TraesCS5B02G448200, TraesCS5A02G444300, TraesCS1B02G480600, …
GO:0009294	DNA mediated transformation	125	10	1.61	5.6e-06	TraesCS6B02G419000, TraesCS1A02G445700, TraesCS4D02G053600, TraesCS2B02G260800, TraesCS4A02G261000, TraesCS2D02G241800, TraesCS2A02G235900, TraesCS6D02G364900, TraesCS1D02G454400, TraesCS6A02G380200
GO:0010424	DNA methylation on cytosine within a CG sequence	22	5	0.28	7.7e-06	TraesCS2D02G241800, TraesCS2A02G235900, TraesCS2B02G260800, TraesCS1A02G005700, TraesCS1D02G002400
GO:2000232	regulation of rRNA processing	11	4	0.14	8.4e-06	TraesCS1A02G227600, TraesCS4B02G037300, TraesCS4D02G034600, TraesCS4A02G276400
GO:0007017	microtubule-based process	588	34	7.59	8.7e-06	TraesCS1A02G258800, TraesCS7B02G190000, TraesCS3A02G333300, TraesCS2B02G415500, TraesCS6D02G363400, TraesCS3A02G275300, TraesCS1B02G320800, TraesCS7A02G223100, TraesCS1A02G350200, TraesCS3B02G371500, TraesCS5A02G407800, TraesCS5B02G160100, TraesCS4D02G057000, TraesCS4A02G257800, TraesCS1B02G364500, TraesCS6D02G130500, TraesCS5A02G032500, TraesCS1A02G095000, TraesCS5D02G417700, TraesCS6B02G169300,…
GO:0000470	maturation of LSU-rRNA	23	5	0.3	9.8e-06	TraesCS2A02G432600, TraesCS5D02G462800, TraesCS2D02G430500, TraesCS5B02G461300, TraesCS5A02G452400
GO:0090116	C-5 methylation of cytosine	12	4	0.15	1.3e-05	TraesCS2D02G241800, TraesCS2A02G235900, TraesCS4B02G201800, TraesCS2B02G260800
GO:0006346	methylation-dependent heterochromatin assembly	61	7	0.79	1.4e-05	TraesCS4A02G261000, TraesCS1D02G002400, TraesCS1A02G005700, TraesCS4D02G053600, TraesCS2D02G493500, TraesCS2D02G489900, TraesCS2B02G521600
GO:0007018	microtubule-based movement	169	11	2.18	1.4e-05	TraesCS2B02G505400, TraesCS5A02G067300, TraesCS3A02G275300, TraesCS3D02G275200, TraesCS2B02G229500, TraesCS6D02G363400, TraesCS1A02G095000, TraesCS2D02G213200, TraesCS5D02G167500, TraesCS5A02G032500, TraesCS5A02G036600
GO:0006397	mRNA processing	613	29	7.91	1.4e-05	TraesCS5D02G167000, TraesCS4D02G018500, TraesCS1B02G165900, TraesCS6A02G024900, TraesCS4B02G043900, TraesCS6B02G472700, TraesCS4B02G020300, TraesCSU02G068100, TraesCS1A02G128600, TraesCS1A02G067300, TraesCS7D02G128800, TraesCS5B02G159400, TraesCS6D02G028200, TraesCS7B02G029700, TraesCS1D02G332500, TraesCS6B02G034100, TraesCS6D02G032100, TraesCS5D02G020900, TraesCS7D02G290300, TraesCS4D02G143400, …
GO:0007064	mitotic sister chromatid cohesion	25	5	0.32	1.5e-05	TraesCS6A02G231400, TraesCS2A02G356300, TraesCS7B02G122400, TraesCS7D02G217100, TraesCS7A02G295800
GO:0000183	chromatin silencing at rDNA	6	3	0.08	4.2e-05	TraesCS7D02G289200, TraesCS7A02G286200, TraesCS7B02G183600
GO:0019510	S-adenosylhomocysteine catabolic process	6	3	0.08	4.2e-05	TraesCS2D02G489900, TraesCS2B02G521600, TraesCS2D02G493500
GO:0080056	petal vascular tissue pattern formation	6	3	0.08	4.2e-05	TraesCS7D02G289200, TraesCS7A02G286200, TraesCS7B02G183600
GO:0080057	sepal vascular tissue pattern formation	6	3	0.08	4.2e-05	TraesCS7D02G289200, TraesCS7A02G286200, TraesCS7B02G183600
GO:0071277	cellular response to calcium ion	16	4	0.21	4.4e-05	TraesCS5A02G260600, TraesCS7A02G529900, TraesCS5B02G258900, TraesCS5D02G268000
GO:0007076	mitotic chromosome condensation	18	4	0.23	7.3e-05	TraesCS1D02G314600, TraesCS2D02G132100, TraesCS1A02G314100, TraesCS1B02G326400
GO:0098532	histone H3-K27 trimethylation	18	4	0.23	7.3e-05	TraesCS1A02G288400, TraesCS1B02G297800, TraesCS1D02G287400, TraesCS7B02G219000
GO:0000226	microtubule cytoskeleton organization	327	16	4.22	8.7e-05	TraesCS4A02G257800, TraesCS5A02G067300, TraesCS1D02G353100, TraesCS1A02G095000, TraesCS7B02G190000, TraesCS5A02G444200, TraesCS1B02G364500, TraesCS5A02G407800, TraesCS4D02G057000, TraesCS2D02G395000, TraesCS5B02G160100, TraesCS2B02G415500, TraesCS5D02G417700, TraesCS1A02G350200, TraesCS7D02G224800, TraesCS7A02G223100
GO:0051574	positive regulation of histone H3-K9 methylation	19	4	0.25	9.1e-05	TraesCS6B02G151600, TraesCS4D02G053600, TraesCS4A02G261000, TraesCS6A02G123400
GO:0051131	chaperone-mediated protein complex assembly	19	4	0.25	9.1e-05	TraesCS5A02G260600, TraesCS7A02G529900, TraesCS5B02G258900, TraesCS5D02G268000
GO:0009556	microsporogenesis	59	6	0.76	0.00011	TraesCS7D02G217100, TraesCS2A02G356300, TraesCS7D02G291200, TraesCS6A02G231400, TraesCS7B02G122400, TraesCS4D02G346600
GO:0009836	fruit ripening, climacteric	84	7	1.08	0.00011	TraesCS2A02G235900, TraesCS6A02G380200, TraesCS6B02G419000, TraesCS1D02G277100, TraesCS2D02G241800, TraesCS6D02G364900, TraesCS2B02G260800
GO:0009408	response to heat	824	29	10.63	0.00012	TraesCS4D02G140800, TraesCS1D02G099600, TraesCS5A02G260600, TraesCS7A02G529900, TraesCS6B02G243700, TraesCS6D02G221000, TraesCS4A02G038500, TraesCS5B02G249000, TraesCS7D02G284400, TraesCS5B02G492500, TraesCS6D02G049100, TraesCS1B02G139600, TraesCS7D02G257300, TraesCS5B02G374900, TraesCS7B02G184100, TraesCS2D02G497800, TraesCS5A02G479300, TraesCS5B02G258900, TraesCS4D02G266700, TraesCS6B02G274600,…
GO:0006349	regulation of gene expression by genetic imprinting	61	6	0.79	0.00014	TraesCS4A02G261000, TraesCS1D02G277100, TraesCS4D02G053600, TraesCS2B02G260800, TraesCS2A02G235900, TraesCS2D02G241800
GO:0006606	protein import into nucleus	89	7	1.15	0.00016	TraesCS6A02G309600, TraesCS1D02G420600, TraesCS2D02G273300, TraesCS6B02G339400, TraesCS2B02G505600, TraesCS6D02G289000, TraesCS1B02G126500
GO:0000478	endonucleolytic cleavage involved in rRNA processing	9	3	0.12	0.00017	TraesCS7D02G289200, TraesCS7A02G286200, TraesCS7B02G183600
GO:0048281	inflorescence morphogenesis	9	3	0.12	0.00017	TraesCS5D02G171900, TraesCS5A02G167500, TraesCS5B02G164500
GO:2001251	negative regulation of chromosome organization	65	6	0.84	0.0002	TraesCS5A02G302000, TraesCS4A02G261000, TraesCS1B02G274600, TraesCS4D02G053600, TraesCS1D02G264100, TraesCS1A02G264000
GO:0006426	glycyl-tRNA aminoacylation	10	3	0.13	0.00024	TraesCS7D02G265200, TraesCS7A02G264300, TraesCS7B02G162300
GO:0044030	regulation of DNA methylation	46	5	0.59	0.00031	TraesCS4A02G261000, TraesCS1B02G154500, TraesCS1A02G132400, TraesCS4D02G053600, TraesCS7D02G246600
GO:0010425	DNA methylation on cytosine within a CNG sequence	11	3	0.14	0.00033	TraesCS6D02G364900, TraesCS6B02G419000, TraesCS6A02G380200
GO:0051301	cell division	750	29	9.68	0.00038	TraesCS5B02G374800, TraesCS5A02G067300, TraesCS2A02G235900, TraesCS6D02G185800, TraesCS6A02G380200, TraesCS6D02G364900, TraesCS2B02G260800, TraesCS7B02G190000, TraesCS2A02G296000, TraesCS3A02G209500, TraesCS4B02G268200, TraesCS5B02G335500, TraesCS5A02G336500, TraesCS1D02G002400, TraesCS6B02G104600, TraesCS5D02G370000, TraesCS2D02G241800, TraesCS5B02G363500, TraesCS7D02G313200, TraesCSU02G142500, …
GO:0009965	leaf morphogenesis	327	13	4.22	0.00038	TraesCS7D02G289200, TraesCS3B02G280400, TraesCS7A02G302200, TraesCS3A02G380100, TraesCS5B02G374800, TraesCS2A02G296000, TraesCS7A02G286200, TraesCS3A02G250900, TraesCS7D02G313200, TraesCS3A02G130000, TraesCS5A02G372700, TraesCS3D02G427300, TraesCS7B02G183600
GO:0032784	regulation of DNA-templated transcription, elongation	28	4	0.36	0.00044	TraesCS1A02G324800, TraesCS7D02G169200, TraesCS3B02G085200, TraesCS1B02G322900
GO:0009615	response to virus	295	12	3.81	0.00051	TraesCS2B02G235100, TraesCS5A02G479300, TraesCS2D02G215300, TraesCS2D02G353600, TraesCS5B02G492500, TraesCS4A02G038500, TraesCS4D02G140800, TraesCS2D02G255400, TraesCS3A02G188400, TraesCS1A02G227600, TraesCS2A02G255000, TraesCS4D02G266700
GO:0032196	transposition	13	3	0.17	0.00056	TraesCS3A02G188400, TraesCS4D02G053600, TraesCS4A02G261000
GO:1903321	negative regulation of protein modification by small protein conjugation or removal	14	3	0.18	0.0007	TraesCS6B02G339400, TraesCS6A02G309600, TraesCS6D02G289000
GO:0006406	mRNA export from nucleus	53	7	0.68	0.00073	TraesCS6D02G289000, TraesCS4D02G018500, TraesCS4B02G020300, TraesCS6B02G339400, TraesCS4A02G293000, TraesCS5A02G552700, TraesCS6A02G309600
GO:1905269	positive regulation of chromatin organization	50	8	0.65	0.00085	TraesCS6B02G151600, TraesCS4A02G261000, TraesCS1D02G002400, TraesCS6A02G123400, TraesCS5B02G163900, TraesCS1A02G005700, TraesCS4D02G053600, TraesCS1B02G086600
GO:0061077	chaperone-mediated protein folding	52	7	0.67	0.00092	TraesCS7D02G284400, TraesCS7A02G291600, TraesCS7A02G529900, TraesCS5D02G268000, TraesCS5B02G258900, TraesCS5A02G260600, TraesCS7B02G184100
GO:0009414	response to water deprivation	2008	43	25.91	0.00096	TraesCS4D02G018500, TraesCS1B02G273000, TraesCS6A02G055200, TraesCS6A02G061300, TraesCS1D02G364400, TraesCS5A02G140200, TraesCS4D02G085300, TraesCS5D02G354700, TraesCS5D02G360900, TraesCS6B02G078200, TraesCS2B02G270600, TraesCS6B02G079200, TraesCS1D02G454400, TraesCSU02G121200, TraesCS5D02G354200, TraesCS7A02G529900, TraesCS5D02G268000, TraesCS1A02G445700, TraesCS5B02G258900, TraesCS1A02G360100, …
GO:0070601	centromeric sister chromatid cohesion	10	4	0.13	0.00097	TraesCS4A02G158700, TraesCS3D02G391700, TraesCSU02G181400, TraesCS3A02G397800
GO:0006430	lysyl-tRNA aminoacylation	16	3	0.21	0.00106	TraesCS5B02G446300, TraesCS5A02G442200, TraesCS5D02G449600
GO:0046034	ATP metabolic process	516	16	6.66	0.00128	TraesCS1D02G196100, TraesCS6B02G243700, TraesCS4B02G238500, TraesCS2A02G547200, TraesCS2A02G293700, TraesCS2A02G509100, TraesCS3B02G126000, TraesCS3A02G239300, TraesCS1B02G385600, TraesCS5A02G014400, TraesCSU02G157100, TraesCS6B02G302700, TraesCS2B02G310000, TraesCS7B02G265500, TraesCS6D02G255500, TraesCS6A02G213700
GO:0080037	negative regulation of cytokinin-activated signaling pathway	18	3	0.23	0.00151	TraesCS7B02G184100, TraesCS7D02G284400, TraesCS7A02G291600
GO:0051085	chaperone cofactor-dependent protein refolding	18	3	0.23	0.00151	TraesCS7B02G184100, TraesCS7D02G284400, TraesCS7A02G291600
GO:0006281	DNA repair	785	21	10.13	0.00157	TraesCS6D02G185800, TraesCS7B02G289500, TraesCS1B02G165900, TraesCS7B02G122400, TraesCS2A02G356300, TraesCS3D02G097700, TraesCS4A02G058000, TraesCS3A02G250900, TraesCS4D02G246300, TraesCS5B02G335500, TraesCS5A02G336500, TraesCS6A02G231400, TraesCS3D02G391700, TraesCS3B02G280400, TraesCS3B02G112900, TraesCS6A02G202200, TraesCS3A02G397800, TraesCS7D02G217100, TraesCS1D02G277100, TraesCS5D02G341200,…
GO:0009826	unidimensional cell growth	903	23	11.65	0.00181	TraesCS1D02G099600, TraesCS1A02G262400, TraesCS3A02G209500, TraesCS4B02G268200, TraesCS1B02G273000, TraesCS3A02G250900, TraesCS1B02G396700, TraesCS5B02G164500, TraesCS6D02G049100, TraesCS4D02G050800, TraesCS5A02G444200, TraesCS4D02G346600, TraesCS1D02G407500, TraesCS3B02G280400, TraesCS5D02G171900, TraesCS4B02G025700, TraesCS5A02G167500, TraesCS1B02G273100, TraesCS5B02G561500, TraesCS1D02G262400,…
GO:0009955	adaxial/abaxial pattern specification	211	9	2.72	0.00181	TraesCS1A02G445700, TraesCS5B02G374800, TraesCS4A02G472200, TraesCS2A02G296000, TraesCS3D02G427300, TraesCS7A02G020200, TraesCS1D02G454400, TraesCS7D02G016500, TraesCS5A02G372700
GO:0051567	histone H3-K9 methylation	89	9	1.15	0.00209	TraesCS6A02G380200, TraesCS6B02G419000, TraesCS4A02G261000, TraesCS7B02G289500, TraesCS4D02G053600, TraesCS6B02G151600, TraesCS6D02G364900, TraesCS3A02G188400, TraesCS6A02G123400
GO:0010286	heat acclimation	177	8	2.28	0.00224	TraesCS5A02G260600, TraesCS5B02G258900, TraesCS6D02G221000, TraesCS7D02G257300, TraesCS6A02G238600, TraesCS5D02G268000, TraesCS7A02G529900, TraesCS2D02G497800
GO:0061087	positive regulation of histone H3-K27 methylation	21	3	0.27	0.00239	TraesCS6B02G151600, TraesCS5B02G163900, TraesCS6A02G123400
GO:0016973	poly(A)+ mRNA export from nucleus	21	3	0.27	0.00239	TraesCS6B02G339400, TraesCS6A02G309600, TraesCS6D02G289000
GO:0051455	monopolar spindle attachment to meiosis I kinetochore	6	2	0.08	0.00241	TraesCS4A02G158700, TraesCSU02G181400
GO:0051754	meiotic sister chromatid cohesion, centromeric	6	2	0.08	0.00241	TraesCS4A02G158700, TraesCSU02G181400
GO:0006166	purine ribonucleoside salvage	6	2	0.08	0.00241	TraesCS6A02G223400, TraesCS6D02G212000
GO:0043044	ATP-dependent chromatin remodeling	22	3	0.28	0.00274	TraesCS3B02G083400, TraesCS3D02G068900, TraesCS1D02G099600
GO:0035065	regulation of histone acetylation	22	3	0.28	0.00274	TraesCS4D02G053600, TraesCS4A02G261000, TraesCS1B02G086600
GO:0006342	chromatin silencing	196	17	2.53	0.00339	TraesCS2B02G260300, TraesCS2D02G489900, TraesCS6A02G380200, TraesCS2D02G493500, TraesCS4A02G261000, TraesCS2B02G521600, TraesCS1D02G002400, TraesCS3A02G188400, TraesCS7D02G289200, TraesCS7B02G289500, TraesCS6B02G419000, TraesCS4D02G053600, TraesCS5A02G302000, TraesCS7B02G183600, TraesCS1A02G005700, TraesCS6D02G364900, TraesCS7A02G286200
GO:0006075	(1->3)-beta-D-glucan biosynthetic process	48	4	0.62	0.00341	TraesCS7D02G026700, TraesCS7A02G555700, TraesCS6B02G468200, TraesCS4D02G346600
GO:0043967	histone H4 acetylation	24	3	0.31	0.00354	TraesCS4D02G053600, TraesCS4A02G261000, TraesCS3D02G211100
GO:0006913	nucleocytoplasmic transport	219	16	2.83	0.00361	TraesCS1B02G126500, TraesCS6B02G339400, TraesCS6A02G309600, TraesCS5A02G552700, TraesCS5B02G374800, TraesCS4D02G018500, TraesCS2A02G296000, TraesCS3D02G427300, TraesCS2B02G505600, TraesCS2D02G273300, TraesCS4A02G063400, TraesCS4A02G293000, TraesCS4B02G020300, TraesCS1D02G420600, TraesCS5A02G372700, TraesCS6D02G289000
GO:0009870	defense response signaling pathway, resistance gene-dependent	79	5	1.02	0.00362	TraesCS5D02G268000, TraesCS5A02G260600, TraesCS5A02G450800, TraesCS5B02G258900, TraesCS7A02G529900
GO:0071472	cellular response to salt stress	153	7	1.97	0.00387	TraesCS1A02G354700, TraesCS3B02G321000, TraesCS1B02G367100, TraesCS1D02G442400, TraesCS1D02G355800, TraesCS1A02G433000, TraesCS3D02G286500
GO:0010118	stomatal movement	578	16	7.46	0.0039	TraesCS5B02G152300, TraesCS4D02G018500, TraesCS4D02G022000, TraesCS3A02G341000, TraesCS5A02G140200, TraesCS4B02G020300, TraesCS4D02G140800, TraesCS5D02G268000, TraesCS7A02G529900, TraesCS5B02G258900, TraesCS5A02G153500, TraesCS3D02G228700, TraesCS5D02G158800, TraesCS5A02G260600, TraesCS4A02G293000, TraesCS3A02G130000
GO:0015865	purine nucleotide transport	25	3	0.32	0.00398	TraesCS6D02G262700, TraesCS6A02G282200, TraesCS6B02G310600
GO:0010449	root meristem growth	117	6	1.51	0.00422	TraesCS7A02G291600, TraesCS7D02G284400, TraesCS7B02G184100, TraesCS1B02G274600, TraesCS1D02G264100, TraesCS1A02G264000
GO:0048467	gynoecium development	240	9	3.1	0.00425	TraesCS7A02G287700, TraesCS3A02G442000, TraesCS7D02G287600, TraesCS3B02G370900, TraesCS3A02G209500, TraesCS3A02G188400, TraesCS7B02G197700, TraesCS6B02G135400, TraesCS3D02G434700
GO:0034976	response to endoplasmic reticulum stress	118	6	1.52	0.0044	TraesCS2A02G545600, TraesCS2B02G576100, TraesCS6D02G049100, TraesCS7A02G529900, TraesCS4B02G101800, TraesCS6A02G042600
GO:0009938	negative regulation of gibberellic acid mediated signaling pathway	26	3	0.34	0.00446	TraesCS4B02G220900, TraesCS4D02G221200, TraesCS6A02G107700
GO:0060968	regulation of gene silencing	173	10	2.23	0.00466	TraesCS3B02G415500, TraesCS6A02G309600, TraesCS6B02G339400, TraesCS4B02G043900, TraesCS1D02G002400, TraesCS7B02G289500, TraesCS5A02G302000, TraesCS1A02G005700, TraesCS2D02G497800, TraesCS6D02G289000
GO:0031935	regulation of chromatin silencing	53	4	0.68	0.00488	TraesCS1D02G002400, TraesCS5A02G302000, TraesCS1A02G005700, TraesCS7B02G289500
GO:0070588	calcium ion transmembrane transport	53	4	0.68	0.00488	TraesCS2D02G430700, TraesCS2A02G432700, TraesCS5B02G276500, TraesCS2B02G454000
GO:0031116	positive regulation of microtubule polymerization	27	3	0.35	0.00497	TraesCS7D02G224800, TraesCS7B02G190000, TraesCS7A02G223100
GO:0001578	microtubule bundle formation	27	3	0.35	0.00497	TraesCS7D02G224800, TraesCS7B02G190000, TraesCS7A02G223100
GO:0050821	protein stabilization	54	4	0.7	0.00522	TraesCS7A02G529900, TraesCS5D02G268000, TraesCS5B02G258900, TraesCS5A02G260600
GO:0007062	sister chromatid cohesion	90	13	1.16	0.00533	TraesCS7D02G217100, TraesCS7B02G122400, TraesCS6A02G231400, TraesCS3B02G112900, TraesCS4A02G158700, TraesCS3A02G397800, TraesCS2A02G356300, TraesCSU02G181400, TraesCS1A02G428700, TraesCS7A02G295800, TraesCS3D02G391700, TraesCS3D02G097700, TraesCS1D02G438000
GO:0042176	regulation of protein catabolic process	55	4	0.71	0.00557	TraesCS4B02G268200, TraesCS2D02G427700, TraesCS4B02G153400, TraesCS6A02G116500
GO:0031055	chromatin remodeling at centromere	9	2	0.12	0.00564	TraesCS1A02G005700, TraesCS1D02G002400
GO:0019646	aerobic electron transport chain	9	2	0.12	0.00564	TraesCS2D02G569300, TraesCS5A02G066100
GO:0006659	phosphatidylserine biosynthetic process	9	2	0.12	0.00564	TraesCS4D02G266700, TraesCS4A02G038500
GO:0030422	production of siRNA involved in RNA interference	127	6	1.64	0.00626	TraesCS3A02G188400, TraesCS5A02G552700, TraesCS1A02G445700, TraesCS6B02G151900, TraesCS1A02G324800, TraesCS6A02G123800
GO:0072583	clathrin-dependent endocytosis	57	4	0.74	0.00632	TraesCS5B02G152300, TraesCS4D02G145200, TraesCS5A02G153500, TraesCS5D02G158800
GO:2000012	regulation of auxin polar transport	58	4	0.75	0.00672	TraesCS7D02G284400, TraesCS7A02G291600, TraesCS3A02G294600, TraesCS7B02G184100
GO:0048443	stamen development	354	11	4.57	0.00681	TraesCS1D02G262400, TraesCS2A02G344300, TraesCS7A02G287700, TraesCS1B02G273100, TraesCS7B02G197700, TraesCS1B02G273000, TraesCS6A02G309600, TraesCS1A02G262400, TraesCS6B02G339400, TraesCS7D02G287600, TraesCS6D02G289000
GO:0042254	ribosome biogenesis	559	26	7.21	0.00685	TraesCS5A02G452400, TraesCS7D02G345100, TraesCS1B02G085800, TraesCS5B02G461300, TraesCS1D02G142200, TraesCS6D02G384500, TraesCS5D02G370000, TraesCS5D02G462800, TraesCS3B02G415500, TraesCS7B02G209900, TraesCS4A02G276400, TraesCS5A02G288400, TraesCS1A02G067300, TraesCS2B02G194400, TraesCS1A02G143400, TraesCS4D02G034600, TraesCS5B02G363500, TraesCS2D02G430500, TraesCS7D02G289200, TraesCS7A02G286200,…
GO:0009833	plant-type primary cell wall biogenesis	10	2	0.13	0.00698	TraesCS6B02G104600, TraesCSU02G142500
GO:0006021	inositol biosynthetic process	10	2	0.13	0.00698	TraesCS4D02G266700, TraesCS4A02G038500
GO:0009910	negative regulation of flower development	215	8	2.77	0.00716	TraesCS5B02G366500, TraesCS6B02G339400, TraesCS6A02G309600, TraesCS3D02G427300, TraesCS2D02G241800, TraesCS2A02G235900, TraesCS6D02G289000, TraesCS2B02G260800
GO:0010197	polar nucleus fusion	181	7	2.34	0.00947	TraesCS7D02G326200, TraesCS1D02G121900, TraesCS1B02G140400, TraesCS6D02G049100, TraesCS7B02G230000, TraesCS6A02G042600, TraesCS7A02G329300
GO:0051346	negative regulation of hydrolase activitivity	34	3	0.44	0.00951	TraesCS1D02G264100, TraesCS1B02G274600, TraesCS1A02G264000
GO:0009908	flower development	1527	40	19.7	0.00985	TraesCS5B02G258900, TraesCS2A02G235900, TraesCS6B02G339400, TraesCS7B02G219000, TraesCS1B02G154500, TraesCS7A02G287700, TraesCS1B02G086600, TraesCS1B02G273000, TraesCS7A02G302200, TraesCS3D02G434700, TraesCS3A02G188400, TraesCS7D02G246600, TraesCS5D02G268000, TraesCS7D02G287600, TraesCS2A02G344300, TraesCS7B02G197700, TraesCS6A02G309600, TraesCS5B02G260000, TraesCS3A02G442000, TraesCS2D02G241800,…
GO:1900034	regulation of cellular response to heat	12	2	0.15	0.01007	TraesCS2D02G497800, TraesCS1D02G099600
GO:0000184	nuclear-transcribed mRNA catabolic process	12	2	0.15	0.01007	TraesCS5B02G160100, TraesCS2B02G257200
GO:0032922	circadian regulation of gene expression	35	3	0.45	0.0103	TraesCS6B02G151600, TraesCS6A02G123400, TraesCS4B02G153700
GO:0009934	regulation of meristem structural organization	66	4	0.85	0.01053	TraesCS5D02G341200, TraesCS7A02G529900, TraesCS5A02G336500, TraesCS5B02G335500
GO:0042773	ATP synthesis coupled electron transport	103	5	1.33	0.01095	TraesCS1B02G385600, TraesCS4B02G238500, TraesCS3B02G126000, TraesCSU02G157100, TraesCS2A02G509100
GO:0009793	embryo development ending in seed dormancy	1649	38	21.28	0.01099	TraesCS1B02G322900, TraesCS2A02G235900, TraesCS1A02G314100, TraesCS1D02G407500, TraesCS2D02G489900, TraesCS1B02G273000, TraesCS4A02G038500, TraesCS7A02G302200, TraesCS2D02G493500, TraesCS3A02G122900, TraesCS7D02G289200, TraesCS4D02G221200, TraesCS7B02G296500, TraesCS2D02G241800, TraesCS3D02G243800, TraesCS4B02G220900, TraesCS1D02G264100, TraesCS1A02G264000, TraesCS1A02G227600, TraesCS5D02G462300,…
GO:0010216	maintenance of DNA methylation	36	3	0.46	0.01113	TraesCS2D02G241800, TraesCS2A02G235900, TraesCS2B02G260800
GO:1905268	negative regulation of chromatin organization	36	3	0.46	0.01113	TraesCS5A02G302000, TraesCS4D02G053600, TraesCS4A02G261000
GO:1901984	negative regulation of protein acetylation	13	2	0.17	0.0118	TraesCS4D02G053600, TraesCS4A02G261000
GO:0035067	negative regulation of histone acetylation	13	2	0.17	0.0118	TraesCS4D02G053600, TraesCS4A02G261000
GO:0060211	regulation of nuclear-transcribed mRNA poly(A) tail shortening	13	2	0.17	0.0118	TraesCS5D02G167000, TraesCS5B02G159400
GO:1900151	regulation of nuclear-transcribed mRNA catabolic process, deadenylation-dependent decay	13	2	0.17	0.0118	TraesCS5D02G167000, TraesCS5B02G159400
GO:2000757	negative regulation of peptidyl-lysine acetylation	13	2	0.17	0.0118	TraesCS4D02G053600, TraesCS4A02G261000
GO:0099587	inorganic ion import across plasma membrance	14	2	0.18	0.01365	TraesCS3A02G442000, TraesCS3D02G434700
GO:1901379	regulation of potassium ion transmembrane transport	14	2	0.18	0.01365	TraesCS3A02G442000, TraesCS3D02G434700
GO:0098659	inorganic cation import across plasma membrane	14	2	0.18	0.01365	TraesCS3A02G442000, TraesCS3D02G434700
GO:0075177	regulation of calcium or calmodulin-mediated signal transduction in response to host	14	2	0.18	0.01365	TraesCS2D02G097500, TraesCS2B02G113800
GO:0075147	regulation of signal transduction in response to host	14	2	0.18	0.01365	TraesCS2D02G097500, TraesCS2B02G113800
GO:0075136	response to host	14	2	0.18	0.01365	TraesCS2D02G097500, TraesCS2B02G113800
GO:0048440	carpel development	196	7	2.53	0.01418	TraesCS3A02G442000, TraesCS7D02G287600, TraesCS6B02G135400, TraesCS7B02G197700, TraesCS3A02G188400, TraesCS7A02G287700, TraesCS3D02G434700
GO:0010102	lateral root morphogenesis	196	7	2.53	0.01418	TraesCS5D02G171900, TraesCS5B02G164500, TraesCS2B02G354400, TraesCS5A02G167500, TraesCS6D02G185800, TraesCS2B02G272400, TraesCS6A02G202200
GO:0051128	regulation of cellular component organization	803	31	10.36	0.01447	TraesCS1D02G099600, TraesCS5B02G163900, TraesCS1D02G264100, TraesCS7B02G289500, TraesCS7B02G190000, TraesCS7B02G265500, TraesCS6A02G309000, TraesCS7B02G167200, TraesCS2D02G286200, TraesCS1D02G002400, TraesCS1B02G274600, TraesCS4D02G053600, TraesCS7B02G219000, TraesCS5A02G444200, TraesCS4B02G173500, TraesCS4D02G346600, TraesCS2D02G497800, TraesCS4A02G261000, TraesCS1A02G264000, TraesCS5A02G302000,…
GO:0048229	gametophyte development	1525	39	19.68	0.01476	TraesCS7D02G291200, TraesCS1D02G142200, TraesCS5D02G341200, TraesCS4D02G346600, TraesCS3A02G397800, TraesCS1B02G140400, TraesCS3D02G203400, TraesCS1D02G099600, TraesCS5B02G335500, TraesCS5A02G336500, TraesCS6D02G049100, TraesCS3A02G341000, TraesCS3A02G188400, TraesCS1A02G143400, TraesCS7A02G329300, TraesCS2A02G356300, TraesCS5B02G561500, TraesCS6A02G231400, TraesCS3A02G200400, TraesCS5B02G094600,…
GO:0016579	protein deubiquitination	154	6	1.99	0.01526	TraesCS4D02G266600, TraesCS4A02G022000, TraesCS3A02G122900, TraesCS7D02G149800, TraesCS4B02G267000, TraesCS2D02G293800
GO:0010101	post-embryonic root morphogenesis	199	7	2.57	0.01529	TraesCS5D02G171900, TraesCS5B02G164500, TraesCS2B02G354400, TraesCS5A02G167500, TraesCS6D02G185800, TraesCS2B02G272400, TraesCS6A02G202200
GO:0010026	trichome differentiation	296	9	3.82	0.01551	TraesCS1A02G095000, TraesCS5D02G341200, TraesCS3B02G280400, TraesCS3A02G250900, TraesCS7D02G313200, TraesCS5B02G335500, TraesCS5A02G336500, TraesCS3A02G209500, TraesCS7B02G167200
GO:0006446	regulation of translational initiation	15	2	0.19	0.01562	TraesCS5D02G167000, TraesCS5B02G159400
GO:0034214	protein hexamerization	15	2	0.19	0.01562	TraesCS2A02G287300, TraesCS6D02G183600
GO:0034767	positive regulation of ion transmembrane transport	15	2	0.19	0.01562	TraesCS3A02G442000, TraesCS3D02G434700
GO:0016925	protein sumoylation	41	3	0.53	0.01585	TraesCS6D02G289000, TraesCS6B02G339400, TraesCS6A02G309600
GO:0051607	defense response to virus	156	6	2.01	0.01616	TraesCS4A02G038500, TraesCS3A02G188400, TraesCS2D02G255400, TraesCS4D02G266700, TraesCS1A02G227600, TraesCS2A02G255000
GO:0009825	multidimensional cell growth	114	5	1.47	0.01639	TraesCS7B02G167200, TraesCS5A02G203300, TraesCS5B02G335500, TraesCS5A02G336500, TraesCS5D02G341200
GO:0010629	negative regulation of gene expression	1646	53	21.24	0.01718	TraesCS1A02G324800, TraesCS2D02G273300, TraesCS6B02G339400, TraesCS2D02G293800, TraesCS2B02G257200, TraesCS1D02G454400, TraesCS5A02G302000, TraesCS5B02G160100, TraesCS1B02G154500, TraesCS6A02G123800, TraesCS5B02G220000, TraesCS2D02G489900, TraesCS4B02G043900, TraesCS1B02G086600, TraesCS4A02G209100, TraesCS2D02G493500, TraesCS3D02G434700, TraesCS3A02G188400, TraesCS6B02G151900, TraesCS5A02G552700,…
GO:0048316	seed development	2294	47	29.6	0.01722	TraesCS7B02G296500, TraesCS1D02G277100, TraesCS4B02G101800, TraesCS2B02G260800, TraesCS1B02G273100, TraesCS7B02G183600, TraesCS4B02G267000, TraesCS1D02G262400, TraesCS6B02G419000, TraesCS7A02G286200, TraesCS1B02G273000, TraesCS1D02G264100, TraesCS6A02G213700, TraesCS1A02G445700, TraesCS1D02G314600, TraesCS1A02G227600, TraesCS4A02G038500, TraesCS5D02G462300, TraesCS1D02G407500, TraesCS4B02G220900,…
GO:0051274	beta-glucan biosynthetic process	254	11	3.28	0.01769	TraesCS4D02G346600, TraesCS5D02G007200, TraesCS3B02G034600, TraesCS6B02G104600, TraesCS2A02G169800, TraesCS6A02G309000, TraesCS6B02G468200, TraesCS7A02G555700, TraesCSU02G142500, TraesCS7D02G026700, TraesCS6B02G353800
GO:0048532	anatomical structure arrangement	253	8	3.26	0.0177	TraesCS5D02G341200, TraesCS4D02G221200, TraesCS5A02G336500, TraesCS5B02G335500, TraesCS4B02G220900, TraesCS7A02G529900, TraesCS3A02G130000, TraesCS7A02G302200
GO:0030244	cellulose biosynthetic process	206	7	2.66	0.01813	TraesCS6B02G353800, TraesCS3B02G034600, TraesCS6B02G104600, TraesCSU02G142500, TraesCS6A02G309000, TraesCS2A02G169800, TraesCS5D02G007200
GO:0009269	response to desiccation	78	4	1.01	0.01849	TraesCS1B02G273100, TraesCS1D02G262400, TraesCS1B02G273000, TraesCS1A02G262400
GO:0010311	lateral root formation	161	6	2.08	0.01858	TraesCS5D02G171900, TraesCS5B02G164500, TraesCS2B02G354400, TraesCS5A02G167500, TraesCS6D02G185800, TraesCS6A02G202200
GO:0045814	negative regulation of gene expression,epigenetic	213	19	2.75	0.01909	TraesCS2B02G260300, TraesCS2D02G489900, TraesCS6A02G380200, TraesCS2D02G493500, TraesCS6B02G151600, TraesCS4A02G261000, TraesCS2B02G521600, TraesCS6A02G123400, TraesCS1D02G002400, TraesCS3A02G188400, TraesCS7D02G289200, TraesCS7B02G289500, TraesCS6B02G419000, TraesCS4D02G053600, TraesCS5A02G302000, TraesCS7B02G183600, TraesCS1A02G005700, TraesCS6D02G364900, TraesCS7A02G286200
GO:0048528	post-embryonic root development	466	12	6.01	0.01915	TraesCS3D02G055500, TraesCS7D02G224800, TraesCS2B02G354400, TraesCS7A02G223100, TraesCS6A02G202200, TraesCS5D02G171900, TraesCS5A02G167500, TraesCS5B02G164500, TraesCS2A02G344300, TraesCS2B02G272400, TraesCS7B02G190000, TraesCS6D02G185800
GO:0042542	response to hydrogen peroxide	308	9	3.97	0.01951	TraesCS5A02G152400, TraesCS4A02G038500, TraesCS6D02G221000, TraesCS1B02G059100, TraesCS6A02G213700, TraesCS6B02G243700, TraesCS2B02G270600, TraesCS4D02G266700, TraesCS6A02G238600
GO:0051571	positive regulation of histone H3-K4 methylation	17	2	0.22	0.01989	TraesCS6B02G151600, TraesCS6A02G123400
GO:1900111	positive regulation of histone H3-K9 dimethylation	17	2	0.22	0.01989	TraesCS6B02G151600, TraesCS6A02G123400
GO:0046085	adenosine metabolic process	17	2	0.22	0.01989	TraesCS6A02G223400, TraesCS6D02G212000
GO:0044403	symbiont process	210	7	2.71	0.0199	TraesCS1B02G126500, TraesCS1B02G059100, TraesCS2B02G113800, TraesCS2D02G097500, TraesCS2D02G353600, TraesCS3A02G188400, TraesCS5B02G220000
GO:0090066	regulation of anatomical structure size	210	7	2.71	0.0199	TraesCS2A02G344300, TraesCS7B02G265500, TraesCS6B02G303400, TraesCS6D02G256200, TraesCS7B02G129700, TraesCS7B02G167200, TraesCS4B02G173500
GO:0032535	regulation of cellular component size	210	7	2.71	0.0199	TraesCS2A02G344300, TraesCS7B02G265500, TraesCS6B02G303400, TraesCS6D02G256200, TraesCS7B02G129700, TraesCS7B02G167200, TraesCS4B02G173500
GO:0010187	negative regulation of seed germination	120	5	1.55	0.02	TraesCS5B02G258900, TraesCS4D02G140800, TraesCS7A02G529900, TraesCS5A02G260600, TraesCS5D02G268000
GO:0045787	positive regulation of cell cycle	80	4	1.03	0.0201	TraesCS5D02G341200, TraesCS5A02G336500, TraesCS5B02G335500, TraesCS2D02G286200
GO:0009790	embryo development	1730	38	22.32	0.0205	TraesCS2D02G493500, TraesCS1A02G227600, TraesCS1B02G273000, TraesCS7A02G302200, TraesCS7A02G286200, TraesCS7D02G289200, TraesCS4D02G266700, TraesCS2D02G489900, TraesCS6A02G380200, TraesCS3B02G139700, TraesCS2A02G235900, TraesCS1B02G322900, TraesCS3D02G243800, TraesCS6D02G364900, TraesCS1D02G314600, TraesCS1B02G274600, TraesCS4B02G101800, TraesCS1D02G407500, TraesCS1A02G314100, TraesCS6B02G335200,…
GO:0009791	post-embryonic development	5343	119	68.94	0.02115	TraesCS7D02G224800, TraesCS6B02G034100, TraesCS5A02G160900, TraesCS4B02G020300, TraesCS5D02G172300, TraesCS1A02G227600, TraesCS7B02G110600, TraesCS1B02G326400, TraesCS1B02G274600, TraesCS3A02G250900, TraesCS3B02G280400, TraesCS1D02G314600, TraesCS7B02G197700, TraesCS5B02G164500, TraesCS5B02G121500, TraesCS5B02G249000, TraesCS5A02G152400, TraesCS1B02G273100, TraesCS2B02G272400, TraesCS6A02G309600,…
GO:0051701	interaction with host	123	5	1.59	0.02198	TraesCS1B02G126500, TraesCS3A02G188400, TraesCS2D02G353600, TraesCS2D02G097500, TraesCS2B02G113800
GO:0048015	phosphatidylinositol-mediated signaling	18	2	0.23	0.02218	TraesCS5D02G015000, TraesCS5B02G121500
GO:0009933	meristem structural organization	216	7	2.79	0.02279	TraesCS4D02G221200, TraesCS7A02G302200, TraesCS5D02G341200, TraesCS5A02G336500, TraesCS5B02G335500, TraesCS7A02G529900, TraesCS4B02G220900
GO:0006260	DNA replication	420	24	5.42	0.02291	TraesCS1D02G298400, TraesCS1B02G309300, TraesCS1D02G264100, TraesCS3A02G380100, TraesCS3D02G097700, TraesCS2D02G282000, TraesCS4B02G246900, TraesCS7A02G131200, TraesCS7B02G031500, TraesCS3A02G200400, TraesCS4A02G058000, TraesCS6B02G393500, TraesCS1B02G146200, TraesCS1A02G299500, TraesCS5D02G100800, TraesCS3D02G203400, TraesCS6D02G344100, TraesCS5B02G094600, TraesCS1B02G274600, TraesCS5A02G088400,…
GO:0009787	regulation of abscisic acid-activated signaling pathway	319	9	4.12	0.0238	TraesCS1B02G367100, TraesCS3B02G321000, TraesCS1D02G442400, TraesCS1A02G354700, TraesCS1D02G355800, TraesCS6A02G309000, TraesCS1A02G433000, TraesCS3D02G286500, TraesCS3A02G130000
GO:1901419	regulation of response to alcohol	319	9	4.12	0.0238	TraesCS1B02G367100, TraesCS3B02G321000, TraesCS1D02G442400, TraesCS1A02G354700, TraesCS1D02G355800, TraesCS6A02G309000, TraesCS1A02G433000, TraesCS3D02G286500, TraesCS3A02G130000
GO:1905957	regulation of cellular response to alcohol	319	9	4.12	0.0238	TraesCS1B02G367100, TraesCS3B02G321000, TraesCS1D02G442400, TraesCS1A02G354700, TraesCS1D02G355800, TraesCS6A02G309000, TraesCS1A02G433000, TraesCS3D02G286500, TraesCS3A02G130000
GO:0022904	respiratory electron transport chain	135	7	1.74	0.02384	TraesCS5A02G066100, TraesCS2D02G569300, TraesCS3B02G126000, TraesCS4B02G238500, TraesCS2A02G509100, TraesCSU02G157100, TraesCS1B02G385600
GO:0051050	positive regulation of transport	48	3	0.62	0.02408	TraesCS3A02G442000, TraesCS4B02G165400, TraesCS3D02G434700
GO:0031057	negative regulation of histone modification	19	2	0.25	0.02458	TraesCS4D02G053600, TraesCS4A02G261000
GO:0051273	beta-glucan metabolic process	270	11	3.48	0.02535	TraesCS4D02G346600, TraesCS5D02G007200, TraesCS3B02G034600, TraesCS6B02G104600, TraesCS2A02G169800, TraesCS6A02G309000, TraesCS6B02G468200, TraesCS7A02G555700, TraesCSU02G142500, TraesCS7D02G026700, TraesCS6B02G353800
GO:0043622	cortical microtubule organization	86	4	1.11	0.02542	TraesCS7A02G223100, TraesCS5A02G444200, TraesCS7D02G224800, TraesCS7B02G190000
GO:0010305	leaf vascular tissue pattern formation	86	4	1.11	0.02542	TraesCS7B02G183600, TraesCS7A02G286200, TraesCS7D02G289200, TraesCS5D02G462300
GO:0030243	cellulose metabolic process	222	7	2.86	0.02596	TraesCS6B02G353800, TraesCS3B02G034600, TraesCS6B02G104600, TraesCSU02G142500, TraesCS6A02G309000, TraesCS2A02G169800, TraesCS5D02G007200
GO:0006119	oxidative phosphorylation	129	5	1.66	0.02632	TraesCS3B02G126000, TraesCS4B02G238500, TraesCS2A02G509100, TraesCSU02G157100, TraesCS1B02G385600
GO:0018027	peptidyl-lysine dimethylation	20	2	0.26	0.02709	TraesCS6B02G151600, TraesCS6A02G123400
GO:0051569	regulation of histone H3-K4 methylation	20	2	0.26	0.02709	TraesCS6B02G151600, TraesCS6A02G123400
GO:1900109	regulation of histone H3-K9 dimethylation	20	2	0.26	0.02709	TraesCS6B02G151600, TraesCS6A02G123400
GO:0036123	histone H3-K9 dimethylation	20	2	0.26	0.02709	TraesCS6B02G151600, TraesCS6A02G123400
GO:0010587	miRNA catabolic process	20	2	0.26	0.02709	TraesCS3B02G415500, TraesCS5B02G121500
GO:0048587	regulation of short-day photoperiodism, flowering	20	2	0.26	0.02709	TraesCS6B02G151600, TraesCS6A02G123400
GO:0009142	nucleoside triphosphate biosynthetic process	436	11	5.63	0.02756	TraesCS3A02G239300, TraesCS2A02G547200, TraesCS2A02G293700, TraesCS2B02G310000, TraesCS7A02G131200, TraesCS7B02G031500, TraesCS6B02G302700, TraesCS5A02G014400, TraesCS6B02G243700, TraesCS6D02G255500, TraesCS6A02G213700
GO:0060969	negative regulation of gene silencing	51	3	0.66	0.02818	TraesCS2D02G497800, TraesCS5A02G302000, TraesCS3B02G415500
GO:0006302	double-strand break repair	226	7	2.92	0.02822	TraesCS6D02G185800, TraesCS5D02G341200, TraesCS3D02G391700, TraesCS5A02G336500, TraesCS5B02G335500, TraesCS3A02G397800, TraesCS6A02G202200
GO:0045892	negative regulation of transcription, DNA-templated	701	29	9.04	0.02841	TraesCS5A02G302000, TraesCS3D02G434700, TraesCS1B02G086600, TraesCS1A02G132400, TraesCS1D02G002400, TraesCS3A02G188400, TraesCS1A02G005700, TraesCS7D02G289200, TraesCS7A02G286200, TraesCS7B02G183600, TraesCS2D02G489900, TraesCS7B02G289500, TraesCS2D02G493500, TraesCS4A02G261000, TraesCS7D02G246600, TraesCS1B02G154500, TraesCS4B02G220900, TraesCS2D02G293800, TraesCS1D02G454400, TraesCS3A02G442000,…
GO:1903507	negative regulation of nucleic acid-templated transcription	704	29	9.08	0.02954	TraesCS5A02G302000, TraesCS3D02G434700, TraesCS1B02G086600, TraesCS1A02G132400, TraesCS1D02G002400, TraesCS3A02G188400, TraesCS1A02G005700, TraesCS7D02G289200, TraesCS7A02G286200, TraesCS7B02G183600, TraesCS2D02G489900, TraesCS7B02G289500, TraesCS2D02G493500, TraesCS4A02G261000, TraesCS7D02G246600, TraesCS1B02G154500, TraesCS4B02G220900, TraesCS2D02G293800, TraesCS1D02G454400, TraesCS3A02G442000,…
GO:1902679	negative regulation of RNA biosynthetic process	704	29	9.08	0.02954	TraesCS5A02G302000, TraesCS3D02G434700, TraesCS1B02G086600, TraesCS1A02G132400, TraesCS1D02G002400, TraesCS3A02G188400, TraesCS1A02G005700, TraesCS7D02G289200, TraesCS7A02G286200, TraesCS7B02G183600, TraesCS2D02G489900, TraesCS7B02G289500, TraesCS2D02G493500, TraesCS4A02G261000, TraesCS7D02G246600, TraesCS1B02G154500, TraesCS4B02G220900, TraesCS2D02G293800, TraesCS1D02G454400, TraesCS3A02G442000,…
GO:0007020	microtubule nucleation	52	3	0.67	0.02963	TraesCS7B02G190000, TraesCS7D02G224800, TraesCS7A02G223100
GO:0048017	inositol lipid-mediated signaling	21	2	0.27	0.02969	TraesCS5D02G015000, TraesCS5B02G121500
GO:1904062	regulation of cation transmembrane transport	21	2	0.27	0.02969	TraesCS3A02G442000, TraesCS3D02G434700
GO:0031122	cytoplasmic microtubule organization	91	4	1.17	0.03045	TraesCS7A02G223100, TraesCS5A02G444200, TraesCS7D02G224800, TraesCS7B02G190000
GO:0030865	cortical cytoskeleton organization	92	4	1.19	0.03152	TraesCS7A02G223100, TraesCS5A02G444200, TraesCS7D02G224800, TraesCS7B02G190000
GO:0000289	nuclear-transcribed mRNA poly(A) tail shortening	22	2	0.28	0.03238	TraesCS5D02G167000, TraesCS5B02G159400
GO:0043270	positive regulation of ion transport	22	2	0.28	0.03238	TraesCS3A02G442000, TraesCS3D02G434700
GO:0051775	response to redox state	22	2	0.28	0.03238	TraesCS6B02G243700, TraesCS6A02G213700
GO:0006304	DNA modification	270	20	3.48	0.03246	TraesCS6B02G419000, TraesCS1D02G002400, TraesCS6D02G364900, TraesCS1D02G277100, TraesCS5A02G302000, TraesCS6B02G151900, TraesCS4A02G261000, TraesCS1A02G324800, TraesCS2B02G260800, TraesCS2A02G235900, TraesCS7D02G246600, TraesCS4B02G201800, TraesCS1A02G005700, TraesCS3A02G188400, TraesCS6A02G380200, TraesCS6A02G123800, TraesCS1A02G132400, TraesCS1B02G154500, TraesCS4D02G053600, TraesCS2D02G241800
GO:0044728	DNA methylation or demethylation	270	20	3.48	0.03246	TraesCS6B02G419000, TraesCS1D02G002400, TraesCS6D02G364900, TraesCS1D02G277100, TraesCS5A02G302000, TraesCS6B02G151900, TraesCS4A02G261000, TraesCS1A02G324800, TraesCS2B02G260800, TraesCS2A02G235900, TraesCS7D02G246600, TraesCS4B02G201800, TraesCS1A02G005700, TraesCS3A02G188400, TraesCS6A02G380200, TraesCS6A02G123800, TraesCS1A02G132400, TraesCS1B02G154500, TraesCS4D02G053600, TraesCS2D02G241800
GO:0045927	positive regulation of growth	93	4	1.2	0.03261	TraesCS4B02G025700, TraesCS1A02G227600, TraesCS2D02G286200, TraesCS5B02G121500
GO:0009553	embryo sac development	525	16	6.77	0.03464	TraesCS6A02G042600, TraesCS3D02G391700, TraesCS1B02G085800, TraesCS1D02G142200, TraesCS3A02G397800, TraesCS1D02G099600, TraesCS7D02G326200, TraesCS5B02G561500, TraesCS7B02G230000, TraesCS1A02G067300, TraesCS1A02G143400, TraesCS6D02G049100, TraesCS1D02G121900, TraesCS7A02G329300, TraesCS1B02G140400, TraesCS3A02G188400
GO:0010047	fruit dehiscence	23	2	0.3	0.03517	TraesCS3A02G442000, TraesCS3D02G434700
GO:0009202	deoxyribonucleoside triphosphate biosynthetic process	23	2	0.3	0.03517	TraesCS7A02G131200, TraesCS7B02G031500
GO:0022603	regulation of anatomical structure morphogenesis	400	10	5.16	0.03644	TraesCS5D02G341200, TraesCS7A02G529900, TraesCS4D02G346600, TraesCS5A02G444200, TraesCS5B02G335500, TraesCS5A02G336500, TraesCS4B02G173500, TraesCS4B02G025700, TraesCS5B02G121500, TraesCS1D02G099600
GO:0010608	posttranscriptional regulation of gene expression	644	18	8.31	0.03649	TraesCS5D02G167000, TraesCS1A02G324800, TraesCS6B02G151900, TraesCS4B02G043900, TraesCS3A02G188400, TraesCS4D02G052700, TraesCS6A02G123800, TraesCS6B02G088500, TraesCS2D02G273300, TraesCS5B02G159400, TraesCS2D02G489900, TraesCS2D02G493500, TraesCS5A02G552700, TraesCS4A02G262300, TraesCS2D02G090300, TraesCS1A02G445700, TraesCS2B02G521600, TraesCS3B02G415500
GO:0000398	mRNA splicing, via spliceosome	350	16	4.52	0.0369	TraesCS5B02G013200, TraesCS2B02G198200, TraesCS7B02G029700, TraesCS6A02G219000, TraesCS4B02G043900, TraesCS4A02G293000, TraesCS1B02G203600, TraesCS4B02G020300, TraesCS1B02G165900, TraesCS7D02G128800, TraesCS5A02G015000, TraesCS1A02G128600, TraesCS1D02G332500, TraesCS4D02G018500, TraesCS5D02G020900, TraesCS6D02G032100
GO:0040008	regulation of growth	692	15	8.93	0.03715	TraesCS7A02G302200, TraesCS1B02G237300, TraesCS1A02G264000, TraesCS4D02G346600, TraesCS1D02G264100, TraesCS5B02G121500, TraesCS4B02G025700, TraesCS5A02G444200, TraesCS7A02G529900, TraesCS2D02G286200, TraesCS1A02G227600, TraesCS1D02G099600, TraesCS7B02G129700, TraesCS4D02G145200, TraesCS1B02G274600
GO:0016444	somatic cell DNA recombination	24	2	0.31	0.03804	TraesCS6D02G185800, TraesCS6A02G202200
GO:0034764	positive regulation of transmembrane transport	24	2	0.31	0.03804	TraesCS3A02G442000, TraesCS3D02G434700
GO:0090626	plant epidermis morphogenesis	295	8	3.81	0.03892	TraesCS7B02G167200, TraesCS3A02G250900, TraesCS3B02G280400, TraesCS7D02G313200, TraesCS2D02G395000, TraesCS1A02G095000, TraesCS2B02G415500, TraesCS3A02G209500
GO:0010154	fruit development	2503	48	32.29	0.04005	TraesCS7B02G296500, TraesCS1D02G277100, TraesCS4B02G101800, TraesCS2B02G260800, TraesCS1B02G273100, TraesCS7B02G183600, TraesCS4B02G267000, TraesCS1D02G262400, TraesCS6B02G419000, TraesCS7A02G286200, TraesCS1B02G273000, TraesCS1D02G264100, TraesCS6A02G213700, TraesCS1A02G445700, TraesCS1D02G314600, TraesCS1A02G227600, TraesCS4A02G038500, TraesCS5D02G462300, TraesCS1D02G407500, TraesCS4B02G220900,…
GO:0051253	negative regulation of RNA metabolic process	729	29	9.41	0.04018	TraesCS1A02G445700, TraesCS7D02G289200, TraesCS6A02G380200, TraesCS7B02G289500, TraesCS6D02G364900, TraesCS3A02G188400, TraesCS7D02G246600, TraesCS4B02G220900, TraesCS1D02G454400, TraesCS2D02G489900, TraesCS7A02G286200, TraesCS1D02G002400, TraesCS4D02G053600, TraesCS3D02G434700, TraesCS7B02G183600, TraesCS3A02G442000, TraesCS4A02G261000, TraesCS5A02G302000, TraesCS2B02G260300, TraesCS1B02G086600,…
GO:0030307	positive regulation of cell growth	59	3	0.76	0.04083	TraesCS5B02G121500, TraesCS1A02G227600, TraesCS4B02G025700
GO:0070646	protein modification by small protein removal	195	6	2.52	0.04169	TraesCS3A02G122900, TraesCS2D02G293800, TraesCS4B02G267000, TraesCS4D02G266600, TraesCS7D02G149800, TraesCS4A02G022000
GO:1902182	shoot apical meristem development	60	3	0.77	0.04258	TraesCS5D02G273300, TraesCS5B02G265100, TraesCS5A02G265400
GO:0010586	miRNA metabolic process	26	2	0.34	0.04405	TraesCS5B02G121500, TraesCS3B02G415500
GO:0010264	myo-inositol hexakisphosphate biosynthetic process	26	2	0.34	0.04405	TraesCS4D02G266700, TraesCS4A02G038500
GO:0033517	myo-inositol hexakisphosphate metabolic process	26	2	0.34	0.04405	TraesCS4D02G266700, TraesCS4A02G038500
GO:0010588	cotyledon vascular tissue pattern formation	61	3	0.79	0.04437	TraesCS7A02G286200, TraesCS7B02G183600, TraesCS7D02G289200
GO:0022622	root system development	1865	37	24.06	0.04509	TraesCS7B02G190000, TraesCS7A02G286200, TraesCS3D02G055500, TraesCS5A02G140200, TraesCS4D02G085300, TraesCS7D02G289200, TraesCS2A02G344300, TraesCS5B02G164500, TraesCS7B02G184100, TraesCS5A02G444200, TraesCS2A02G296000, TraesCS5A02G167500, TraesCS6A02G202200, TraesCS5D02G171900, TraesCS1D02G454400, TraesCS7A02G223100, TraesCS7D02G284400, TraesCS1B02G274600, TraesCS4D02G050800, TraesCS7A02G291600,…
GO:0048364	root development	1865	37	24.06	0.04509	TraesCS7B02G190000, TraesCS7A02G286200, TraesCS3D02G055500, TraesCS5A02G140200, TraesCS4D02G085300, TraesCS7D02G289200, TraesCS2A02G344300, TraesCS5B02G164500, TraesCS7B02G184100, TraesCS5A02G444200, TraesCS2A02G296000, TraesCS5A02G167500, TraesCS6A02G202200, TraesCS5D02G171900, TraesCS1D02G454400, TraesCS7A02G223100, TraesCS7D02G284400, TraesCS1B02G274600, TraesCS4D02G050800, TraesCS7A02G291600,…
GO:0006301	postreplication repair	27	2	0.35	0.04718	TraesCS3D02G097700, TraesCS3B02G112900
GO:0043266	regulation of potassium ion transport	27	2	0.35	0.04718	TraesCS3D02G434700, TraesCS3A02G442000
GO:0016441	posttranscriptional gene silencing	382	13	4.93	0.04737	TraesCS2D02G489900, TraesCS3B02G415500, TraesCS4B02G043900, TraesCS2B02G521600, TraesCS6B02G088500, TraesCS1A02G324800, TraesCS2D02G273300, TraesCS3A02G188400, TraesCS5A02G552700, TraesCS6A02G123800, TraesCS1A02G445700, TraesCS6B02G151900, TraesCS2D02G493500
GO:0033500	carbohydrate homeostasis	105	4	1.35	0.04744	TraesCS2B02G289600, TraesCS1A02G227600, TraesCS2A02G270800, TraesCS7B02G265500
GO:0000911	cytokinesis by cell plate formation	202	6	2.61	0.04801	TraesCS7D02G313200, TraesCS5A02G067300, TraesCS3B02G371500, TraesCS7A02G223100, TraesCS7B02G190000, TraesCS7D02G224800
GO:0000904	cell morphogenesis involved in differentiation	780	16	10.06	0.04854	TraesCS3A02G209500, TraesCS4B02G268200, TraesCS3A02G250900, TraesCS7B02G167200, TraesCS1B02G396700, TraesCS6D02G049100, TraesCS4D02G050800, TraesCS4D02G346600, TraesCS1D02G407500, TraesCS3B02G280400, TraesCS7D02G313200, TraesCS4B02G025700, TraesCS5B02G561500, TraesCS1A02G095000, TraesCS6A02G042600, TraesCS3D02G243800
GO:0042273	ribosomal large subunit biogenesis	51	7	0.66	0.04976	TraesCS1D02G142200, TraesCS1A02G143400, TraesCS5D02G462800, TraesCS2A02G432600, TraesCS2D02G430500, TraesCS5A02G452400, TraesCS5B02G461300

## Sheet: cc
Supplementary Table S4 Gene Ontology (GO) analysis of the differentially expressed genes assigned to the turquoise module. Go terms in bp, cc, and mf were shown in separate sheets. bp, biological process; mf, molecular function; cc, cellular component.
GO.ID	Term	Annotated	Significant	Expected	Fisher	gene
GO:0005730	nucleolus	1711	262	33.06	< 1e-30	TraesCS5A02G227800, TraesCS3D02G088900, TraesCS4A02G063400, TraesCS2A02G432600, TraesCS3A02G188400, TraesCS6A02G042600, TraesCS1B02G273000, TraesCS4D02G140800, TraesCS6A02G055200, TraesCS2B02G371800, TraesCS7A02G286200, TraesCS3B02G370900, TraesCS7A02G461100, TraesCS3A02G107800, TraesCS6A02G061300, TraesCS1D02G364400, TraesCS1B02G154500, TraesCS6A02G123800, TraesCS3B02G089900, TraesCS5A02G160900,…
GO:0009506	plasmodesma	3624	306	70.03	< 1e-30	TraesCS1B02G434000, TraesCS2D02G489900, TraesCS2B02G576100, TraesCS6A02G309600, TraesCS2B02G194400, TraesCS1A02G190400, TraesCS4A02G099900, TraesCS1D02G121200, TraesCS7A02G020200, TraesCS5D02G171900, TraesCS1B02G378300, TraesCS2A02G545600, TraesCS1A02G288400, TraesCS5B02G389100, TraesCS7D02G454200, TraesCS1B02G126500, TraesCS5B02G437200, TraesCS4A02G257800, TraesCS1B02G386600, TraesCS1D02G236500,…
GO:0000786	nucleosome	610	128	11.79	< 1e-30	TraesCSU02G077200, TraesCS5A02G444300, TraesCS1B02G192500, TraesCSU02G121200, TraesCS1A02G367900, TraesCS6B02G078400, TraesCS5B02G389100, TraesCS1D02G039800, TraesCS1B02G386200, TraesCS6B02G049300, TraesCS1A02G132400, TraesCS3B02G114400, TraesCS6A02G062800, TraesCS1A02G360100, TraesCS6A02G086200, TraesCS3B02G610800, TraesCS5B02G058200, TraesCS6A02G035000, TraesCS1A02G228700, TraesCS1B02G480600, T…
GO:0022625	cytosolic large ribosomal subunit	292	51	5.64	< 1e-30	TraesCS2A02G170800, TraesCS5A02G112400, TraesCS2A02G432600, TraesCS5B02G118400, TraesCS6A02G204900, TraesCS1D02G407500, TraesCS2D02G379700, TraesCS4B02G339500, TraesCS6B02G425000, TraesCS4A02G208000, TraesCS5A02G320100, TraesCS1D02G264200, TraesCS7B02G444400, TraesCS5D02G462800, TraesCS1A02G148400, TraesCS5D02G129200, TraesCS5A02G227800, TraesCS3B02G370900, TraesCS5B02G374800, TraesCS6A02G385700,…
GO:0005829	cytosol	6513	316	125.86	< 1e-30	TraesCS6D02G178200, TraesCS5D02G172800, TraesCS5D02G171900, TraesCS5A02G168500, TraesCS1B02G364500, TraesCS7D02G224800, TraesCS2D02G109000, TraesCS3B02G370900, TraesCS5B02G118400, TraesCS6D02G384200, TraesCS5D02G354200, TraesCS7B02G266300, TraesCS1D02G236500, TraesCS5B02G418200, TraesCS7B02G219000, TraesCS5B02G509600, TraesCS5A02G121600, TraesCS1B02G146100, TraesCS5A02G442500, TraesCS3D02G195500,…
GO:0022627	cytosolic small ribosomal subunit	188	37	3.63	2.3e-26	TraesCS4D02G191400, TraesCS7D02G066800, TraesCS2B02G293800, TraesCS7D02G313200, TraesCS1A02G105400, TraesCS2B02G189500, TraesCS2D02G064500, TraesCS5D02G451100, TraesCS1A02G092900, TraesCS5B02G437200, TraesCS2B02G078300, TraesCS2A02G276100, TraesCS4B02G260600, TraesCS5A02G443700, TraesCS4D02G260400, TraesCS2B02G443000, TraesCS7B02G198400, TraesCS2B02G078200, TraesCS1D02G101600, TraesCS2D02G170600,…
GO:0005774	vacuolar membrane	2140	118	41.35	5.6e-25	TraesCS5A02G227800, TraesCS5D02G442100, TraesCS5D02G509600, TraesCS2A02G117300, TraesCS5A02G407800, TraesCS4A02G166900, TraesCS5B02G492500, TraesCS1B02G172400, TraesCS1D02G283800, TraesCS2B02G400600, TraesCS7D02G454200, TraesCS5B02G349000, TraesCS1A02G201600, TraesCS5A02G140200, TraesCS5D02G121600, TraesCS5A02G260600, TraesCS6D02G262700, TraesCS6B02G078400, TraesCS7B02G334600, TraesCS2A02G383600,…
GO:0042555	MCM complex	28	16	0.54	7.9e-21	TraesCS3A02G200400, TraesCS3D02G097700, TraesCS1D02G298400, TraesCS5D02G100800, TraesCS5A02G088400, TraesCS6D02G344100, TraesCS3B02G112900, TraesCS1B02G309300, TraesCS1B02G146200, TraesCS1D02G264100, TraesCS1B02G274600, TraesCS5B02G094600, TraesCS1A02G299500, TraesCS1A02G264000, TraesCS3D02G203400, TraesCS6B02G393500
GO:0009507	chloroplast	7828	271	151.27	3.6e-19	TraesCS6A02G380200, TraesCS1B02G259600, TraesCS2B02G289600, TraesCS1B02G386400, TraesCS1A02G234900, TraesCS1A02G350200, TraesCS6B02G082600, TraesCS6B02G169300, TraesCS7B02G122400, TraesCS7B02G198400, TraesCS2D02G275100, TraesCS6A02G204900, TraesCS3A02G341000, TraesCS7D02G297100, TraesCS1B02G357600, TraesCS2A02G432600, TraesCS4B02G204400, TraesCS2A02G312400, TraesCS7A02G461100, TraesCS5D02G509800,…
GO:0000347	THO complex	34	14	0.66	8.7e-16	TraesCS3A02G200400, TraesCS5A02G552700, TraesCS1D02G298400, TraesCS5D02G100800, TraesCS5A02G088400, TraesCS6D02G344100, TraesCS1B02G309300, TraesCS1D02G264100, TraesCS1B02G274600, TraesCS5B02G094600, TraesCS1A02G299500, TraesCS1A02G264000, TraesCS6B02G393500, TraesCS3D02G203400
GO:0009570	chloroplast stroma	2459	108	47.52	1.1e-15	TraesCS7B02G296500, TraesCS1B02G386400, TraesCS4B02G101800, TraesCS1A02G368000, TraesCS1B02G172400, TraesCS7D02G477400, TraesCS1D02G373800, TraesCSU02G077200, TraesCS1A02G367900, TraesCS1A02G190400, TraesCS5B02G258900, TraesCS3B02G089900, TraesCS1B02G416600, TraesCS3D02G088900, TraesCS6D02G046600, TraesCS4D02G295500, TraesCS7A02G491100, TraesCS5A02G051900, TraesCS6B02G115800, TraesCS6A02G086200, …
GO:0005886	plasma membrane	6964	222	134.57	7.6e-15	TraesCS6B02G468200, TraesCS5D02G172800, TraesCS5A02G168500, TraesCS4A02G135200, TraesCS1B02G364500, TraesCS3B02G370900, TraesCS6D02G384200, TraesCS5D02G354200, TraesCS7B02G266300, TraesCS7B02G289000, TraesCS5B02G418200, TraesCS5B02G509600, TraesCS3D02G203800, TraesCS1B02G146100, TraesCS5D02G509800, TraesCS1B02G367100, TraesCS1B02G320800, TraesCS3D02G243800, TraesCS2D02G493500, TraesCS7A02G291600,…
GO:0005634	nucleus	9988	456	193.01	1.7e-14	TraesCS5D02G509600, TraesCS6B02G135400, TraesCS3A02G294600, TraesCS5A02G443800, TraesCS6A02G034600, TraesCS5D02G121600, TraesCS7D02G345100, TraesCS1B02G367100, TraesCS1D02G039800, TraesCS6B02G082600, TraesCS7A02G302200, TraesCS1B02G237300, TraesCS4D02G246300, TraesCS2D02G389100, TraesCS5D02G462300, TraesCS5D02G423300, TraesCS3D02G099000, TraesCS6B02G049300, TraesCS6A02G204900, TraesCS5A02G220000,…
GO:0005618	cell wall	2281	99	44.08	4.3e-14	TraesCS5D02G442100, TraesCS1D02G368700, TraesCS4B02G101800, TraesCS5B02G492500, TraesCS1D02G264200, TraesCS7D02G009400, TraesCS4B02G190000, TraesCS4D02G279400, TraesCS5B02G258900, TraesCS5B02G013200, TraesCS4B02G268200, TraesCS2D02G354800, TraesCS6A02G282200, TraesCS5B02G437200, TraesCS4D02G140800, TraesCS2A02G432600, TraesCS6A02G042600, TraesCS1D02G420600, TraesCS2A02G276100, TraesCS1B02G139600,…
GO:0009534	chloroplast thylakoid	1790	82	34.59	5.3e-13	TraesCS3D02G088900, TraesCS3B02G089900, TraesCS3B02G114600, TraesCS6D02G046600, TraesCS1A02G368000, TraesCS6D02G046200, TraesCSU02G081100, TraesCS4A02G099900, TraesCS6A02G086400, TraesCS6A02G040500, TraesCS4B02G054200, TraesCS1B02G386700, TraesCS5D02G063200, TraesCS1D02G373800, TraesCS7B02G394400, TraesCS4D02G054200, TraesCS7A02G491000, TraesCS3A02G088800, TraesCS2B02G310000, TraesCS2D02G310800, …
GO:0045298	tubulin complex	12	8	0.23	8.7e-12	TraesCS5A02G407800, TraesCS1B02G364500, TraesCS1B02G320800, TraesCS1A02G350200, TraesCS4D02G057000, TraesCS1D02G353100, TraesCS4A02G257800, TraesCS5D02G417700
GO:0005874	microtubule	243	21	4.7	1.4e-08	TraesCS1A02G095000, TraesCS7A02G223100, TraesCS1D02G353100, TraesCS5A02G407800, TraesCS7D02G454200, TraesCS1B02G320800, TraesCS1B02G364500, TraesCS1A02G258800, TraesCS1A02G350200, TraesCS1D02G258800, TraesCS3A02G333300, TraesCS4A02G257800, TraesCS5D02G167500, TraesCS7D02G224800, TraesCS6D02G130500, TraesCS6B02G169300, TraesCS1D02G309200, TraesCS7B02G190000, TraesCS5D02G417700, TraesCS4D02G057000,…
GO:0048471	perinuclear region of cytoplasm	29	7	0.56	1.1e-06	TraesCS1A02G354700, TraesCS1D02G442400, TraesCS3B02G321000, TraesCS1D02G355800, TraesCS3D02G286500, TraesCS1B02G367100, TraesCS1A02G433000
GO:0005719	nuclear euchromatin	19	5	0.37	2.5e-05	TraesCS3A02G188400, TraesCS2D02G068300, TraesCS1D02G121900, TraesCS2A02G069500, TraesCS1B02G140400
GO:0016363	nuclear matrix	11	4	0.21	4.1e-05	TraesCS5A02G479300, TraesCS5B02G492500, TraesCS1A02G428700, TraesCS1D02G438000
GO:0005852	eukaryotic translation initiation 3 complex	75	8	1.45	0.0001	TraesCS5B02G446600, TraesCS5A02G220000, TraesCS5D02G416000, TraesCS6B02G307400, TraesCS5D02G228100, TraesCS5D02G449900, TraesCS5A02G442500, TraesCS5B02G260000
GO:0035101	FACT complex	14	4	0.27	0.00012	TraesCS2D02G068300, TraesCS1D02G121900, TraesCS2A02G069500, TraesCS1B02G140400
GO:0033186	CAF-1 complex	6	3	0.12	0.00014	TraesCS5D02G341200, TraesCS5B02G335500, TraesCS5A02G336500
GO:0071439	clathrin complex	6	3	0.12	0.00014	TraesCS5D02G158800, TraesCS5A02G153500, TraesCS5B02G152300
GO:0048046	apoplast	1494	50	28.87	0.00014	TraesCS5B02G258900, TraesCS5D02G509700, TraesCS5A02G203300, TraesCS5A02G479300, TraesCS3D02G211100, TraesCS7D02G306600, TraesCS5D02G186200, TraesCS5A02G168500, TraesCS1B02G172400, TraesCS7D02G454200, TraesCS2D02G489900, TraesCS7B02G362600, TraesCS5B02G022800, TraesCS5B02G492500, TraesCS2D02G493500, TraesCS3A02G341000, TraesCS5D02G268000, TraesCS6B02G169300, TraesCS5D02G031300, TraesCS5D02G509600,…
GO:0010369	chromocenter	94	8	1.82	0.00048	TraesCS1D02G366600, TraesCS3D02G150300, TraesCS1B02G376700, TraesCS3A02G134000, TraesCS1B02G376300, TraesCS1A02G005700, TraesCS1D02G002400, TraesCS2D02G497800
GO:0005795	Golgi stack	40	5	0.77	0.001	TraesCS7B02G181400, TraesCS1A02G095000, TraesCS5A02G094300, TraesCS4A02G166900, TraesCS4B02G096600
GO:0101031	chaperone complex	14	3	0.27	0.00223	TraesCS7B02G184100, TraesCS7D02G284400, TraesCS7A02G291600
GO:0030132	clathrin coat of coated pit	16	3	0.31	0.00334	TraesCS5D02G158800, TraesCS5A02G153500, TraesCS5B02G152300
GO:0008278	cohesin complex	18	3	0.35	0.00472	TraesCS7A02G295800, TraesCS3D02G391700, TraesCS3A02G397800
GO:0044445	cytosolic part	819	101	15.83	0.00638	TraesCS2B02G109000, TraesCS4A02G472200, TraesCS5B02G374800, TraesCS3A02G107800, TraesCS5B02G468500, TraesCS5B02G442100, TraesCS5B02G437200, TraesCS4D02G140800, TraesCS2D02G430500, TraesCS1D02G368700, TraesCS5B02G112200, TraesCS5B02G461300, TraesCS6A02G385700, TraesCS5D02G296200, TraesCS2A02G276100, TraesCS2B02G293800, TraesCS6B02G225600, TraesCS5A02G288400, TraesCS7D02G306600, TraesCS1D02G236500,…
GO:0030130	clathrin coat of trans-Golgi network vesicle	20	3	0.39	0.00641	TraesCS5D02G158800, TraesCS5A02G153500, TraesCS5B02G152300
GO:0072686	mitotic spindle	20	3	0.39	0.00641	TraesCS7B02G190000, TraesCS7D02G224800, TraesCS7A02G223100
GO:0009579	thylakoid	2413	102	46.63	0.00998	TraesCS1B02G386400, TraesCS4B02G101800, TraesCS1A02G368000, TraesCS7D02G477400, TraesCS1D02G373800, TraesCSU02G077200, TraesCS1A02G367900, TraesCS1A02G190400, TraesCS5D02G354700, TraesCS3B02G089900, TraesCS1B02G416600, TraesCS2A02G293700, TraesCS3D02G088900, TraesCS1D02G364400, TraesCS6D02G046600, TraesCS7A02G491100, TraesCS5A02G051900, TraesCS6B02G115800, TraesCS6A02G086200, TraesCS5D02G360900, …
GO:0042579	microbody	715	23	13.82	0.01295	TraesCS2B02G354400, TraesCS1B02G059100, TraesCS5D02G020900, TraesCS1B02G367100, TraesCS5D02G031300, TraesCS6B02G243700, TraesCS3B02G321000, TraesCS5B02G013200, TraesCS7B02G157800, TraesCS4A02G293000, TraesCS1D02G442400, TraesCS5A02G015000, TraesCS3D02G286500, TraesCS6A02G213700, TraesCS5D02G465100, TraesCS1D02G355800, TraesCS6B02G423000, TraesCS4B02G020300, TraesCS4D02G018500, TraesCS1A02G433000,…
GO:0005777	peroxisome	715	23	13.82	0.01295	TraesCS2B02G354400, TraesCS1B02G059100, TraesCS5D02G020900, TraesCS1B02G367100, TraesCS5D02G031300, TraesCS6B02G243700, TraesCS3B02G321000, TraesCS5B02G013200, TraesCS7B02G157800, TraesCS4A02G293000, TraesCS1D02G442400, TraesCS5A02G015000, TraesCS3D02G286500, TraesCS6A02G213700, TraesCS5D02G465100, TraesCS1D02G355800, TraesCS6B02G423000, TraesCS4B02G020300, TraesCS4D02G018500, TraesCS1A02G433000,…
GO:0022626	cytosolic ribosome	772	99	14.92	0.01306	TraesCS2B02G109000, TraesCS4A02G472200, TraesCS5B02G374800, TraesCS5B02G468500, TraesCS3A02G107800, TraesCS5B02G442100, TraesCS5B02G437200, TraesCS4D02G140800, TraesCS2D02G430500, TraesCS1D02G368700, TraesCS5B02G112200, TraesCS5B02G461300, TraesCS6A02G385700, TraesCS5D02G296200, TraesCS2A02G276100, TraesCS2B02G293800, TraesCS6B02G225600, TraesCS5A02G288400, TraesCS7D02G306600, TraesCS1D02G236500,…
GO:0030981	cortical microtubule cytoskeleton	73	5	1.41	0.01358	TraesCS7A02G223100, TraesCS7D02G224800, TraesCS7B02G190000, TraesCS5D02G167500, TraesCS3B02G371500
GO:0044464	cell part	32715	713	632.19	0.0145	TraesCS3A02G294600, TraesCS6B02G255800, TraesCS2B02G272400, TraesCS6A02G231400, TraesCS2A02G276100, TraesCS1B02G449700, TraesCS6A02G040400, TraesCS5B02G509700, TraesCS2B02G400600, TraesCS7D02G360200, TraesCS7B02G209900, TraesCS5B02G098400, TraesCS2A02G119400, TraesCS7D02G290300, TraesCS5B02G118400, TraesCS1A02G445900, TraesCS1D02G397100, TraesCS6B02G243700, TraesCSU02G081100, TraesCS5B02G509600, …
GO:0005623	cell	32726	713	632.41	0.01505	TraesCS3A02G294600, TraesCS6B02G255800, TraesCS2B02G272400, TraesCS6A02G231400, TraesCS2A02G276100, TraesCS1B02G449700, TraesCS6A02G040400, TraesCS5B02G509700, TraesCS2B02G400600, TraesCS7D02G360200, TraesCS7B02G209900, TraesCS5B02G098400, TraesCS2A02G119400, TraesCS7D02G290300, TraesCS5B02G118400, TraesCS1A02G445900, TraesCS1D02G397100, TraesCS6B02G243700, TraesCSU02G081100, TraesCS5B02G509600, …
GO:0005635	nuclear envelope	235	10	4.54	0.01671	TraesCS6B02G339400, TraesCS5B02G372400, TraesCS1B02G126500, TraesCS6B02G210100, TraesCS4A02G063400, TraesCS6A02G309600, TraesCS5A02G370100, TraesCS6A02G175000, TraesCS4B02G268200, TraesCS6D02G289000
GO:0010005	cortical microtubule, transverse to long axis	29	3	0.56	0.01808	TraesCS7D02G224800, TraesCS7B02G190000, TraesCS7A02G223100
GO:0030863	cortical cytoskeleton	80	5	1.55	0.01949	TraesCS7A02G223100, TraesCS7D02G224800, TraesCS7B02G190000, TraesCS5D02G167500, TraesCS3B02G371500
GO:0005654	nucleoplasm	907	30	17.53	0.0252	TraesCS1D02G121900, TraesCS1B02G140400, TraesCS6B02G151900, TraesCS3A02G188400, TraesCS6B02G088500, TraesCS4B02G268200, TraesCS6B02G472700, TraesCS7D02G297100, TraesCS1D02G160800, TraesCS6D02G049100, TraesCS6D02G256200, TraesCS2D02G068300, TraesCS3D02G211100, TraesCS6A02G219000, TraesCS6B02G151600, TraesCS2D02G145300, TraesCS6A02G123800, TraesCS6B02G303400, TraesCS2A02G141800, TraesCS5A02G160900,…
GO:0031897	Tic complex	15	2	0.29	0.03315	TraesCS2A02G287300, TraesCS6D02G183600
GO:0005694	chromosome	1173	153	22.67	0.03426	TraesCS1A02G361600, TraesCS7A02G295800, TraesCS1B02G357600, TraesCS6B02G116000, TraesCS3B02G114400, TraesCS3B02G089900, TraesCS2D02G068300, TraesCS5D02G451200, TraesCS1A02G228700, TraesCS7D02G061900, TraesCS6A02G040400, TraesCS1A02G388600, TraesCS5B02G449000, TraesCS4D02G053600, TraesCS6A02G035000, TraesCS5D02G354200, TraesCS1B02G154500, TraesCS6B02G082600, TraesCS1D02G039800, TraesCS6B02G048500,…
GO:0009574	preprophase band	64	4	1.24	0.03534	TraesCS3B02G371500, TraesCS7B02G190000, TraesCS7D02G224800, TraesCS7A02G223100
GO:0005665	RNA polymerase II, core complex	65	4	1.26	0.0371	TraesCS7A02G301900, TraesCS7D02G297100, TraesCS7B02G202000, TraesCS5A02G160900
GO:0055028	cortical microtubule	67	4	1.29	0.04077	TraesCS5D02G167500, TraesCS7B02G190000, TraesCS7D02G224800, TraesCS7A02G223100
GO:0034399	nuclear periphery	28	6	0.54	0.04148	TraesCS1A02G428700, TraesCS5A02G479300, TraesCS5B02G492500, TraesCS6D02G256200, TraesCS6B02G303400, TraesCS1D02G438000
GO:0005881	cytoplasmic microtubule	68	4	1.31	0.04269	TraesCS5D02G167500, TraesCS7B02G190000, TraesCS7D02G224800, TraesCS7A02G223100
GO:0032991	protein-containing complex	6942	351	134.15	0.04318	TraesCS1A02G227600, TraesCS6B02G468200, TraesCS7B02G029700, TraesCS7B02G394400, TraesCS1A02G228700, TraesCS6A02G040500, TraesCS6B02G393500, TraesCS1B02G364500, TraesCS2D02G395200, TraesCS2D02G109000, TraesCS7D02G246600, TraesCS3B02G370900, TraesCS5B02G118400, TraesCS1D02G121900, TraesCS5D02G354200, TraesCS6A02G123800, TraesCS5B02G448200, TraesCS1D02G039800, TraesCS1D02G298400, TraesCS1D02G236500,…
GO:0098797	plasma membrane protein complex	85	7	1.64	0.04415	TraesCS4D02G346600, TraesCS5D02G158800, TraesCS5A02G153500, TraesCS7D02G026700, TraesCS6B02G468200, TraesCS5B02G152300, TraesCS7A02G555700
GO:0031985	Golgi cisterna	18	2	0.35	0.04651	TraesCS4B02G096600, TraesCS4A02G166900

## Sheet: mf
Supplementary Table S4 Gene Ontology (GO) analysis of the differentially expressed genes assigned to the turquoise module. Go terms in bp, cc, and mf were shown in separate sheets. bp, biological process; mf, molecular function; cc, cellular component.
GO.ID	Term	Annotated	Significant	Expected	Fisher	gene
GO:0003729	mRNA binding	1125	139	13.59	< 1e-30	TraesCS4B02G111500, TraesCS3D02G199400, TraesCS7D02G289200, TraesCS1A02G433000, TraesCS5B02G226600, TraesCS7D02G454200, TraesCS7B02G071400, TraesCS7B02G029700, TraesCS5A02G452400, TraesCS5D02G509600, TraesCS4B02G190000, TraesCS5B02G442100, TraesCS2D02G264000, TraesCS5D02G423300, TraesCS1B02G367100, TraesCS7B02G198400, TraesCS3B02G370900, TraesCS2A02G432600, TraesCS4D02G197100, TraesCS3B02G321000,…
GO:0046982	protein heterodimerization activity	829	112	10.01	< 1e-30	TraesCS6A02G040400, TraesCS3D02G075900, TraesCS1A02G388600, TraesCS6D02G040200, TraesCS7A02G295800, TraesCS6A02G061300, TraesCSU02G121200, TraesCS1B02G386400, TraesCS6B02G049500, TraesCS6A02G040200, TraesCS1D02G039800, TraesCS6B02G082600, TraesCS7D02G477400, TraesCS6A02G034600, TraesCS6A02G086400, TraesCS1B02G386200, TraesCS6B02G049300, TraesCS5A02G384300, TraesCS5B02G349000, TraesCS6A02G062800, …
GO:0003735	structural constituent of ribosome	1279	93	15.45	< 1e-30	TraesCS2D02G064500, TraesCS6B02G425000, TraesCS7A02G020200, TraesCS1D02G101600, TraesCS5D02G451100, TraesCS1B02G146100, TraesCS4A02G208000, TraesCS2A02G296000, TraesCS4D02G260400, TraesCS3A02G107800, TraesCS5D02G129200, TraesCS2B02G235100, TraesCS5A02G320100, TraesCS1D02G264200, TraesCS1D02G407500, TraesCS5D02G442100, TraesCS2B02G400600, TraesCS2B02G189500, TraesCS7D02G066800, TraesCS7D02G313200,…
GO:0003677	DNA binding	7165	216	86.53	< 1e-30	TraesCS1A02G038200, TraesCS7D02G538400, TraesCS6B02G151900, TraesCS2B02G257200, TraesCS1B02G386400, TraesCS6B02G082600, TraesCS7D02G061900, TraesCS3D02G351400, TraesCS1D02G002400, TraesCS2B02G415900, TraesCS3B02G610800, TraesCS2B02G520600, TraesCS7A02G552400, TraesCS7D02G297100, TraesCS1B02G357600, TraesCS4B02G204400, TraesCS2A02G312400, TraesCS5D02G452000, TraesCS1A02G190400, TraesCS1B02G386200,…
GO:0003924	GTPase activity	483	37	5.83	1.1e-18	TraesCS4D02G197100, TraesCS1D02G404000, TraesCS7B02G362600, TraesCS5B02G509700, TraesCS1A02G350200, TraesCS1B02G364500, TraesCS5D02G417700, TraesCS5D02G509700, TraesCS6D02G130500, TraesCS4A02G257800, TraesCS4D02G057000, TraesCS1D02G258800, TraesCS5A02G415400, TraesCS5D02G509800, TraesCS1A02G258800, TraesCS7D02G449300, TraesCS1D02G309200, TraesCS1B02G320800, TraesCS5A02G407800, TraesCS4D02G022000,…
GO:0005200	structural constituent of cytoskeleton	52	16	0.63	1.2e-18	TraesCS1A02G350200, TraesCS3A02G333300, TraesCS1B02G320800, TraesCS4D02G057000, TraesCS4A02G257800, TraesCS4D02G050800, TraesCS1D02G309200, TraesCS1B02G364500, TraesCS5D02G417700, TraesCS1A02G258800, TraesCS5A02G407800, TraesCS7D02G454200, TraesCS6D02G130500, TraesCS6B02G169300, TraesCS1D02G258800, TraesCS1D02G353100
GO:0005525	GTP binding	676	40	8.16	3.3e-16	TraesCS1A02G258800, TraesCS5A02G467400, TraesCS3A02G333300, TraesCS2A02G083000, TraesCS4D02G022000, TraesCS1A02G093900, TraesCS4A02G107600, TraesCS6A02G309000, TraesCS2D02G080800, TraesCS1B02G320800, TraesCS5B02G509600, TraesCS5D02G509600, TraesCS5A02G415600, TraesCS7D02G449300, TraesCS5D02G423300, TraesCS1A02G350200, TraesCS5B02G418100, TraesCS5A02G407800, TraesCS5A02G415400, TraesCS4D02G057000,…
GO:0005507	copper ion binding	680	37	8.21	5.7e-14	TraesCS7B02G209900, TraesCS7A02G362900, TraesCS2A02G293700, TraesCS6A02G282200, TraesCS5B02G509600, TraesCS5D02G509600, TraesCS5B02G022800, TraesCS6B02G255800, TraesCS6A02G223400, TraesCS7D02G449300, TraesCS7B02G266300, TraesCS1B02G059100, TraesCS2D02G489900, TraesCS2D02G493500, TraesCS1D02G031900, TraesCS6A02G213700, TraesCS7D02G360200, TraesCS7D02G306600, TraesCS5B02G509700, TraesCS5D02G509700,…
GO:0051082	unfolded protein binding	247	23	2.98	6.5e-14	TraesCS7D02G332900, TraesCS7D02G364400, TraesCS7B02G269300, TraesCS5D02G268000, TraesCS7A02G529900, TraesCS5B02G267900, TraesCS2B02G576100, TraesCS6A02G101800, TraesCS7A02G346200, TraesCS5A02G260600, TraesCS7A02G358400, TraesCS2A02G545600, TraesCS5A02G268100, TraesCS5B02G249000, TraesCS5D02G276100, TraesCS6D02G232600, TraesCS5B02G258900, TraesCS6A02G101900, TraesCS7B02G237000, TraesCS6B02G129800,…
GO:0090079	translation regulator activity, acid binding	306	24	3.7	8e-13	TraesCS5A02G220000, TraesCS5D02G416000, TraesCS5A02G415400, TraesCS2B02G097100, TraesCS5D02G423300, TraesCS5D02G228100, TraesCS2D02G080800, TraesCS5A02G442500, TraesCS4B02G170900, TraesCS6B02G307400, TraesCS4D02G197100, TraesCS4A02G107600, TraesCS5B02G418200, TraesCS5A02G415600, TraesCS7B02G266300, TraesCS5D02G449900, TraesCS4D02G172900, TraesCS7A02G362900, TraesCS2A02G083000, TraesCS2A02G169800,…
GO:0003746	translation elongation factor activity	84	14	1.01	1.8e-12	TraesCS7A02G362900, TraesCS4A02G107600, TraesCS4D02G197100, TraesCS2A02G083000, TraesCS7D02G360200, TraesCS5A02G415400, TraesCS5B02G418200, TraesCS7B02G266300, TraesCS2A02G169800, TraesCS2B02G097100, TraesCS5B02G418100, TraesCS5A02G415600, TraesCS5D02G423300, TraesCS2D02G080800
GO:0031491	nucleosome binding	15	7	0.18	2.2e-10	TraesCS3B02G083400, TraesCS7D02G289200, TraesCS3D02G068900, TraesCS2D02G293800, TraesCS1D02G099600, TraesCS7A02G286200, TraesCS7B02G183600
GO:0003682	chromatin binding	257	25	3.1	1.2e-09	TraesCS1D02G438000, TraesCS3D02G068900, TraesCS6B02G419000, TraesCS1D02G002400, TraesCS6D02G364900, TraesCS5A02G352100, TraesCS2B02G260800, TraesCS2A02G235900, TraesCS1D02G099600, TraesCS7B02G219000, TraesCS7A02G295800, TraesCS7A02G286200, TraesCS3B02G083400, TraesCS7D02G538400, TraesCS4B02G201800, TraesCS1A02G005700, TraesCS3A02G188400, TraesCS6A02G380200, TraesCS2D02G293800, TraesCS7D02G289200,…
GO:0005515	protein binding	25915	494	312.98	2e-09	TraesCS2B02G272400, TraesCS6A02G040400, TraesCS7D02G360200, TraesCS7B02G209900, TraesCS7D02G290300, TraesCS2B02G505600, TraesCS6B02G243700, TraesCSU02G081100, TraesCS4A02G030400, TraesCS1D02G160800, TraesCS3D02G384700, TraesCS6D02G004800, TraesCS7A02G491100, TraesCS3D02G097700, TraesCS4B02G220900, TraesCS6A02G040200, TraesCS4D02G166700, TraesCS1A02G361600, TraesCS6B02G005400, TraesCS7A02G491000, …
GO:0031369	translation initiation factor binding	20	7	0.24	2.5e-09	TraesCS6B02G307400, TraesCS5D02G416000, TraesCS5A02G442500, TraesCS5D02G449900, TraesCS5D02G228100, TraesCS5B02G446600, TraesCS5A02G220000
GO:0003676	nucleic acid binding	11871	425	143.37	2.3e-07	TraesCS6B02G049500, TraesCS5D02G451200, TraesCS5B02G418200, TraesCS2D02G391500, TraesCS5B02G349900, TraesCS6B02G088500, TraesCS1D02G396600, TraesCS7D02G280400, TraesCS7D02G167400, TraesCS7B02G362600, TraesCS1B02G273000, TraesCS5A02G415400, TraesCS4B02G020300, TraesCS1B02G086600, TraesCS1D02G364400, TraesCS5B02G064900, TraesCS5A02G452400, TraesCS7B02G230000, TraesCS7B02G110600, TraesCS5D02G451100,…
GO:0042393	histone binding	146	12	1.76	2.5e-07	TraesCS7B02G110600, TraesCS1D02G002400, TraesCS1A02G005700, TraesCS4D02G085300, TraesCS7A02G203600, TraesCS6A02G202200, TraesCS5A02G302000, TraesCS6B02G151600, TraesCS6A02G123400, TraesCS7D02G206700, TraesCS2D02G293800, TraesCS6D02G185800
GO:0030527	structural constituent of chromatin	7	4	0.08	7.2e-07	TraesCSU02G099700, TraesCS7A02G552400, TraesCS7D02G538400, TraesCS5A02G352100
GO:0003678	DNA helicase activity	72	8	0.87	2.7e-06	TraesCS5D02G100800, TraesCS4A02G261000, TraesCS3A02G200400, TraesCS1B02G146200, TraesCS5A02G088400, TraesCS3D02G203400, TraesCS4D02G053600, TraesCS5B02G094600
GO:0003918	DNA topoisomerase type II (ATP-ATP-hydrolyzing) activity	36	6	0.43	4.4e-06	TraesCS6D02G246300, TraesCS6B02G295700, TraesCS6A02G268600, TraesCS1A02G260500, TraesCS1D02G260500, TraesCS1B02G271100
GO:0003777	microtubule motor activity	166	11	2	6.5e-06	TraesCS2B02G505400, TraesCS5A02G067300, TraesCS3A02G275300, TraesCS3D02G275200, TraesCS2B02G229500, TraesCS6D02G363400, TraesCS1A02G095000, TraesCS2D02G213200, TraesCS5D02G167500, TraesCS5A02G032500, TraesCS5A02G036600
GO:0003886	DNA (cytosine-5-)-methyltransferase activity	60	7	0.72	8.1e-06	TraesCS4B02G201800, TraesCS6D02G364900, TraesCS6B02G419000, TraesCS6A02G380200, TraesCS2B02G260800, TraesCS2A02G235900, TraesCS2D02G241800
GO:0008017	microtubule binding	363	16	4.38	1.2e-05	TraesCS5A02G067300, TraesCS6D02G363400, TraesCS3D02G275200, TraesCS1A02G095000, TraesCS5D02G167500, TraesCS7B02G190000, TraesCS5A02G444200, TraesCS2B02G229500, TraesCS2D02G213200, TraesCS5A02G036600, TraesCS3A02G275300, TraesCS7D02G224800, TraesCS3B02G371500, TraesCS5A02G032500, TraesCS7A02G223100, TraesCS2B02G505400
GO:0004013	adenosylhomocysteinase activity	6	3	0.07	3.4e-05	TraesCS2D02G489900, TraesCS2B02G521600, TraesCS2D02G493500
GO:0032051	clathrin light chain binding	6	3	0.07	3.4e-05	TraesCS5D02G158800, TraesCS5A02G153500, TraesCS5B02G152300
GO:0003743	translation initiation factor activity	187	10	2.26	0.0001	TraesCS5D02G416000, TraesCS5A02G442500, TraesCS5D02G449900, TraesCS4B02G170900, TraesCS4D02G172900, TraesCS5B02G446600, TraesCS5A02G220000, TraesCS6B02G307400, TraesCS5B02G260000, TraesCS5D02G228100
GO:0042800	histone methyltransferase activity activity (H3-K4 specific)	9	3	0.11	0.00014	TraesCS7B02G197700, TraesCS7A02G287700, TraesCS7D02G287600
GO:0005524	ATP binding	8934	144	107.9	0.00019	TraesCS3B02G455000, TraesCS2B02G257200, TraesCS7A02G264300, TraesCS7A02G291300, TraesCS6D02G402600, TraesCS2B02G415500, TraesCS5A02G067300, TraesCS4B02G165400, TraesCS6D02G232600, TraesCS5D02G465100, TraesCS7A02G419400, TraesCS3B02G083400, TraesCS5A02G428900, TraesCS2A02G547200, TraesCS3D02G203400, TraesCS7D02G338800, TraesCS7D02G291200, TraesCS5B02G446300, TraesCS3D02G384700, TraesCS4B02G043900,…
GO:0004820	glycine-tRNA ligase activity	10	3	0.12	0.0002	TraesCS7D02G265200, TraesCS7A02G264300, TraesCS7B02G162300
GO:0003697	single-stranded DNA binding	105	7	1.27	0.0003	TraesCS1B02G273100, TraesCS4D02G018500, TraesCS1D02G262400, TraesCS4A02G293000, TraesCS1B02G273000, TraesCS4B02G020300, TraesCS1A02G262400
GO:0003899	DNA-directed 5'-3' RNA polymerase activity	186	9	2.25	0.00047	TraesCS7A02G301900, TraesCS5D02G383900, TraesCS3A02G455500, TraesCS6A02G123800, TraesCS6B02G151900, TraesCS7B02G202000, TraesCS5A02G160900, TraesCS7D02G297100, TraesCS2D02G282000
GO:0004824	lysine-tRNA ligase activity	16	3	0.19	0.00087	TraesCS5B02G446300, TraesCS5A02G442200, TraesCS5D02G449600
GO:0019904	protein domain specific binding	17	3	0.21	0.00105	TraesCS4A02G268700, TraesCS4B02G045500, TraesCS3D02G055500
GO:0005198	structural molecule activity	1488	120	17.97	0.0012	TraesCS5D02G158800, TraesCS2D02G064500, TraesCS6B02G425000, TraesCS7D02G538400, TraesCS7A02G020200, TraesCS1D02G101600, TraesCS5D02G451100, TraesCS1B02G146100, TraesCS4A02G208000, TraesCS2A02G296000, TraesCS4D02G260400, TraesCS3A02G107800, TraesCS5D02G129200, TraesCS2B02G235100, TraesCS5A02G320100, TraesCS1D02G264200, TraesCS1D02G407500, TraesCS5D02G442100, TraesCS2B02G400600, TraesCS3A02G333300,…
GO:0051879	Hsp90 protein binding	18	3	0.22	0.00125	TraesCS7B02G184100, TraesCS7D02G284400, TraesCS7A02G291600
GO:0005471	ATP:ADP antiporter activity	19	3	0.23	0.00147	TraesCS6B02G310600, TraesCS6D02G262700, TraesCS6A02G282200
GO:0005388	calcium-transporting ATPase activity	44	4	0.53	0.00195	TraesCS2D02G430700, TraesCS2A02G432700, TraesCS5B02G276500, TraesCS2B02G454000
GO:0003871	5-methyltetrahydropteroyltriglutamate-homocysteine S-methyltransferase activity	6	2	0.07	0.00212	TraesCS5D02G031300, TraesCS5B02G022800
GO:0008705	methionine synthase activity	6	2	0.07	0.00212	TraesCS5D02G031300, TraesCS5B02G022800
GO:0003843	1,3-beta-D-glucan synthase activity	47	4	0.57	0.0025	TraesCS7D02G026700, TraesCS7A02G555700, TraesCS6B02G468200, TraesCS4D02G346600
GO:0008097	5S rRNA binding	25	3	0.3	0.00331	TraesCS5A02G372700, TraesCS5B02G374800, TraesCS2A02G296000
GO:0019843	rRNA binding	145	9	1.75	0.00343	TraesCS5B02G374800, TraesCS5B02G112200, TraesCS5A02G372700, TraesCS7A02G020200, TraesCS2A02G362000, TraesCS5D02G121600, TraesCS2A02G296000, TraesCS4A02G472200, TraesCS7D02G016500
GO:0030619	U1 snRNA binding	9	2	0.11	0.00496	TraesCS1B02G203600, TraesCS1A02G128600
GO:0031072	heat shock protein binding	49	6	0.59	0.00608	TraesCS7D02G284400, TraesCS7A02G291600, TraesCS6B02G274600, TraesCS5B02G374900, TraesCS7B02G184100, TraesCS6D02G232600
GO:0008886	glyceraldehyde-3-phosphate dehydrogenase (NADP+) (non-phosphorylating) activity	10	2	0.12	0.00615	TraesCS6B02G243700, TraesCS6A02G213700
GO:0019899	enzyme binding	706	17	8.53	0.00621	TraesCS6A02G309000, TraesCS5A02G479300, TraesCS4D02G052700, TraesCS6A02G223400, TraesCS4D02G140800, TraesCS2D02G273300, TraesCS6B02G335200, TraesCS3D02G213100, TraesCS2B02G505600, TraesCS2B02G270600, TraesCS4A02G262300, TraesCS3D02G055500, TraesCS4B02G173500, TraesCS5B02G492500, TraesCS4B02G153700, TraesCS6D02G212000, TraesCS5B02G561500
GO:0017111	nucleoside-triphosphatase activity	1956	89	23.62	0.00685	TraesCS5A02G415600, TraesCS5B02G094600, TraesCS5A02G032500, TraesCS7A02G461100, TraesCS6B02G295700, TraesCS6B02G169300, TraesCS6A02G268600, TraesCS6A02G309000, TraesCS2A02G344300, TraesCS1A02G095000, TraesCS5D02G100800, TraesCS4D02G053600, TraesCS3A02G333300, TraesCS4A02G107600, TraesCS7D02G454200, TraesCS1D02G353100, TraesCS6B02G302700, TraesCS2B02G097100, TraesCS5B02G418100, TraesCS5D02G509800,…
GO:0030623	U5 snRNA binding	11	2	0.13	0.00745	TraesCS7D02G128800, TraesCS7B02G029700
GO:0017070	U6 snRNA binding	11	2	0.13	0.00745	TraesCS7D02G128800, TraesCS7B02G029700
GO:0008115	sarcosine oxidase activity	11	2	0.13	0.00745	TraesCS5B02G275700, TraesCS5D02G283800
GO:0004365	glyceraldehyde-3-phosphate dehydrogenase (NAD+) (phosphorylating) activity	13	2	0.16	0.0104	TraesCS6B02G243700, TraesCS6A02G213700
GO:0043891	glyceraldehyde-3-phosphate dehydrogenase (NAD(P)+) (phosphorylating) activity	13	2	0.16	0.0104	TraesCS6B02G243700, TraesCS6A02G213700
GO:0010428	methyl-CpNpG binding	14	2	0.17	0.01204	TraesCS1A02G005700, TraesCS1D02G002400
GO:0010429	methyl-CpNpN binding	14	2	0.17	0.01204	TraesCS1A02G005700, TraesCS1D02G002400
GO:0008327	methyl-CpG binding	14	2	0.17	0.01204	TraesCS1A02G005700, TraesCS1D02G002400
GO:0101005	ubiquitinyl hydrolase activity	158	6	1.91	0.01279	TraesCS4D02G266600, TraesCS4A02G022000, TraesCS3A02G122900, TraesCS7D02G149800, TraesCS3A02G183700, TraesCS4B02G267000
GO:0004176	ATP-dependent peptidase activity	15	2	0.18	0.01378	TraesCS2A02G287300, TraesCS6D02G183600
GO:0004748	ribonucleoside-diphosphate reductase activity, thioredoxin disulfide as acceptor	15	2	0.18	0.01378	TraesCS7A02G131200, TraesCS7B02G031500
GO:0061731	ribonucleoside-diphosphate reductase activity	15	2	0.18	0.01378	TraesCS7A02G131200, TraesCS7B02G031500
GO:0016728	oxidoreductase activity, acting on CH or CH2 groups, disulfide as acceptor	15	2	0.18	0.01378	TraesCS7A02G131200, TraesCS7B02G031500
GO:0035064	methylated histone binding	43	3	0.52	0.01514	TraesCS6B02G151600, TraesCS6A02G123400, TraesCS4D02G085300
GO:0140034	methylation-dependent protein binding	43	3	0.52	0.01514	TraesCS6B02G151600, TraesCS6A02G123400, TraesCS4D02G085300
GO:0010385	double-stranded methylated DNA binding	17	2	0.21	0.01757	TraesCS1A02G005700, TraesCS1D02G002400
GO:0003714	transcription corepressor activity	46	3	0.56	0.01813	TraesCS4D02G085300, TraesCS4D02G221200, TraesCS4B02G220900
GO:0072509	divalent inorganic cation transmembrane transporter activity	127	5	1.53	0.01936	TraesCS5B02G276500, TraesCS2B02G454000, TraesCS2A02G432700, TraesCS2D02G430700, TraesCS2D02G422000
GO:0019206	nucleoside kinase activity	19	2	0.23	0.02175	TraesCS6A02G223400, TraesCS6D02G212000
GO:0140142	nucleocytoplasmic carrier activity	20	2	0.24	0.02397	TraesCS5B02G561500, TraesCS1B02G126500
GO:0030060	L-malate dehydrogenase activity	21	2	0.25	0.02628	TraesCS1D02G153900, TraesCS1B02G172400
GO:0016887	ATPase activity	1121	30	13.54	0.02748	TraesCS5B02G276500, TraesCS7B02G181800, TraesCS5D02G167500, TraesCS1A02G260500, TraesCS6D02G255500, TraesCS4D02G053600, TraesCS5B02G258900, TraesCS4A02G261000, TraesCS6B02G302700, TraesCS2D02G087900, TraesCS7A02G291300, TraesCS6B02G295700, TraesCS6D02G246300, TraesCS2A02G287300, TraesCS2A02G547200, TraesCS7B02G289500, TraesCS2B02G454000, TraesCS2A02G432700, TraesCS1B02G271100, TraesCS6A02G268600,…
GO:1902936	phosphatidylinositol bisphosphate binding	22	2	0.27	0.02869	TraesCS7D02G257300, TraesCS3A02G130000
GO:0003954	NADH dehydrogenase activity	243	7	2.93	0.0292	TraesCS5B02G098400, TraesCS2A02G509100, TraesCSU02G157100, TraesCS3B02G126000, TraesCS4B02G238500, TraesCS6D02G139500, TraesCS1B02G385600
GO:0036459	thiol-dependent ubiquitinyl hydrolase activity	150	5	1.81	0.03611	TraesCS4D02G266600, TraesCS4A02G022000, TraesCS3A02G122900, TraesCS7D02G149800, TraesCS4B02G267000
GO:0019903	protein phosphatase binding	25	2	0.3	0.03638	TraesCS6A02G309000, TraesCS3D02G213100
GO:0003755	peptidyl-prolyl cis-trans isomerase activity	106	4	1.28	0.04	TraesCS6A02G176900, TraesCS6B02G208900, TraesCS7D02G403300, TraesCS2B02G260600
GO:0008137	NADH dehydrogenase (ubiquinone) activity	208	6	2.51	0.04156	TraesCS3B02G126000, TraesCS4B02G238500, TraesCS2A02G509100, TraesCSU02G157100, TraesCS1B02G385600, TraesCS5B02G098400
GO:0050136	NADH dehydrogenase (quinone) activity	208	6	2.51	0.04156	TraesCS3B02G126000, TraesCS4B02G238500, TraesCS2A02G509100, TraesCSU02G157100, TraesCS1B02G385600, TraesCS5B02G098400
GO:0004386	helicase activity	232	13	2.8	0.04415	TraesCS5D02G465100, TraesCS4B02G043900, TraesCS5B02G094600, TraesCS4A02G261000, TraesCS1D02G099600, TraesCS5D02G100800, TraesCS1B02G146200, TraesCS2B02G257200, TraesCS4A02G124200, TraesCS3A02G200400, TraesCS3D02G203400, TraesCS4D02G053600, TraesCS5A02G088400
GO:0001882	nucleoside binding	706	42	8.53	0.04731	TraesCS1A02G258800, TraesCS5A02G467400, TraesCS3A02G333300, TraesCS2A02G083000, TraesCS4D02G022000, TraesCS1A02G093900, TraesCS4A02G107600, TraesCS6A02G309000, TraesCS2D02G080800, TraesCS1B02G320800, TraesCS3A02G380100, TraesCS5D02G383900, TraesCS5B02G509600, TraesCS5D02G509600, TraesCS5A02G415600, TraesCS7D02G449300, TraesCS5D02G423300, TraesCS1A02G350200, TraesCS5B02G418100, TraesCS5A02G407800,…
GO:0140030	modification-dependent protein binding	67	3	0.81	0.04761	TraesCS6B02G151600, TraesCS6A02G123400, TraesCS4D02G085300
GO:0016725	oxidoreductase activity, acting on CH or CH2 groups	29	2	0.35	0.04771	TraesCS7A02G131200, TraesCS7B02G031500
