# Supplementary material for: Comparative Transcriptome and DNA Methylation Analysis in Temperature-Sensitive Genic Male Sterile Wheat BS366
Source: Research Square preprint supplement (doi:10.21203/rs.3.rs-582568/v1), 2021-07-07
Supplement: Supplementary file 2 [file 6e42df352831fb7e866144a0.xlsx]

## Sheet: Sheet1
Supplementary Table S4 The methylation ratio of each sample.
Sample	CCGG Site Number	CCWGG Site Number	CCGG ratio	CCGG Average	CCWGG Ratio	CCWGG Average
sBS366.1	3522609	2164245	0.073		0.0917
sBS366.2	2954140	1708675	0.0612	0.0671	0.0724	0.0821
fBS366.1	3535015	2132996	0.0732		0.0904
fBS366.2	3411028	2005711	0.0707	0.072	0.085	0.0877
sJ411.1	3292342	2049616	0.0682		0.0869
sJ411.2	3042417	1737503	0.063	0.0656	0.0736	0.0803
fJ411.1	3259532	2038803	0.0675		0.0864
fJ411.2	3123537	1903583	0.0647	0.0661	0.0807	0.0835
CG sites in the genome 48266131
CCWGG sites in the genome 23594351
